## 1           **"Self-inactivating" rabies viruses are just first-generation, $\Delta G$ rabies viruses**

2  
3 Makoto Matsuyama<sup>1</sup>, Lei Jin<sup>1</sup>, Thomas K. Lavin<sup>1</sup>, Heather A. Sullivan<sup>1</sup>, YuanYuan Hou<sup>1</sup>,  
4 Nicholas E. Lea<sup>1</sup>, Maxwell T. Pruner<sup>1</sup>, María Lucía Dam Ferdínez<sup>1</sup>, and Ian R. Wickersham<sup>1</sup>

5  
6 <sup>1</sup>McGovern Institute for Brain Research, Massachusetts Institute of Technology, Cambridge, MA  
7

### 8 9           **SUMMARY**

10  
11 A recent article in *Cell* reported a new form of modified rabies virus that was apparently capable  
12 of labeling neurons "without adverse effects on neuronal physiology and circuit function". These  
13 "self-inactivating" rabies ("SiR") viruses differed from the widely-used first-generation deletion-  
14 mutant ( $\Delta G$ ) rabies viruses only by the addition of a destabilization domain to the viral  
15 nucleoprotein. However, we observed that the transsynaptic tracing results from that article were  
16 inconsistent with the logic described in it, and we hypothesized that the viruses used were actually  
17 mutants that had lost the intended modification to the nucleoprotein. We obtained samples of two  
18 SiR viruses from the authors and show here that, in both "SiR-CRE" and "SiR-FLPo", the great  
19 majority of viral particles were indeed mutants that had lost the intended modification and were  
20 therefore just first-generation,  $\Delta G$  rabies viruses. We also found that SiR-CRE killed 70% of  
21 infected neurons *in vivo* within two weeks. We have shown elsewhere that a  $\Delta G$  rabies virus  
22 encoding Cre can leave a large percentage of labeled neurons alive; we presume that Ciabatti et  
23 al. found such remaining neurons at long survival times and mistakenly concluded that they had  
24 developed a nontoxic version of rabies virus. Here we have analyzed only the two samples that  
25 were sent to MIT by Ciabatti et al., and these may not be from the same batches that were used  
26 for their paper. However, 1) both of the two viruses that we analyzed had independently lost the  
27 intended modification, 2) the mutations in the two samples were genetically quite distinct from  
28 each other yet in both cases caused the same result: total or near-total loss of the C-terminal  
29 modification, and 3) the mutations that we found in these two virus samples perfectly explain the  
30 otherwise-paradoxical transsynaptic tracing results from Ciabatti et al.'s paper. We suggest that  
31 the SiR strategy, or any other such attempt to attenuate a virus by addition rather than deletion,  
32 is an inherently unstable approach that can easily be evaded by mutation, as it was in this case.  
33

### 34           **INTRODUCTION**

35  
36 Monosynaptic tracing based on deletion-mutant rabies virus has become an important tool in  
37 neuroscience since its introduction in 2007(Wickersham et al., 2007b) and remains the only way  
38 of labeling neurons directly presynaptic to some targeted neuronal group in the absence of prior  
39 hypotheses(Augustine et al., 2018; Evans et al., 2018; Kaelberer et al., 2018; Kohl et al., 2018).  
40 Its core principles are 1) the selective infection of the targeted neuron group with a recombinant  
41 rabies virus with one deleted gene (which in all work published to date is the "G" gene encoding  
42 its envelope glycoprotein), and 2) the *in vivo* complementation of the deletion by expression of  
43 the deleted gene in *trans* in the targeted starting neurons. With all its gene products present in  
44 the starting cells, the virus can fully replicate within them and spreads, as wild-type rabies virus  
45 does, to the cells directly presynaptic to the initially infected neurons. Unlike wild-type rabies virus,  
46 however, once inside the presynaptic cells, the deletion-mutant (" $\Delta G$ ", denoting the deletion of G)  
47 is unable to produce its glycoprotein and is therefore unable to spread beyond these secondarily  
48 infected cells, resulting in labeling of just the neurons in the initially targeted population and ones  
49 that are directly presynaptic to them(Wickersham et al., 2007b).

50           A drawback of these  $\Delta G$  (or "first-generation"(Chatterjee et al., 2018)) rabies viruses is  
51 that they are cytotoxic(Chatterjee et al., 2018; Reardon et al., 2016; Wickersham et al., 2007a),

52 which has spurred several labs to develop less-toxic versions. Reardon, Murray et al. (Reardon et  
53 al., 2016) found that simply using  $\Delta G$  rabies virus of a different parent strain — switching from the  
54 original SAD B19 strain to the more neuroinvasive CVS N2c strain (Morimoto et al., 1999) —  
55 decreased toxicity and increased transsynaptic labeling efficiency. Our own group has taken a  
56 more drastic approach, recently introducing "second-generation" rabies viruses from which both  
57 G and a second gene, "L", encoding the viral polymerase, are deleted (Chatterjee et al., 2018).  
58 Deletion of L reduces the transcriptional activity of the virus to extremely low levels, eliminating  
59 any detectable toxicity but necessitating that the viruses encode Cre or FLPo recombinase  
60 (instead of more normal transgene products) and are used in reporter mice or in combination with  
61 recombinase-dependent adeno-associated viral vectors (AAVs). While we showed in our paper  
62 only that these second-generation, " $\Delta GL$ " viruses are efficient means of direct retrograde targeting  
63 of projection neurons,  $\Delta GL$  viruses can also be used (in work so far unpublished) for monosynaptic  
64 tracing, at the cost of the additional complexity of expressing the second deleted gene in *trans*.

65 In another notable development, Ciabatti et al. claimed in a paper published in *Cell* that  
66 they had created a nontoxic version of  $\Delta G$  rabies virus that could be used for monosynaptic tracing  
67 with no need to express any additional genes other than G (Ciabatti et al., 2017). The new virus,  
68 termed "self-inactivating rabies" virus or "SiR", was simply a  $\Delta G$ , SAD B19 strain rabies virus  
69 except for one modification: the addition of a destabilization domain to the viral nucleoprotein,  
70 encoded by "N", the first gene in the rabies viral genome. This destabilization (or "PEST") domain  
71 was linked to the nucleoprotein's C terminus by the cleavage site of tobacco etch virus protease  
72 (TEVP). The authors' intent was that, in the absence of TEVP, newly-produced nucleoprotein (the  
73 indispensable protein which encapsidates the viral genome and without which no transcription or  
74 replication can occur) would be rapidly degraded because of the attached destabilization domain  
75 and that the transcription and replication activity of the virus would therefore be greatly reduced,  
76 making the virus nontoxic. Because of this reduction in transcription, the SiR viruses encoded Cre  
77 or FLPo recombinases and were used in reporter mice or with reporter AAVs, paralleling our own  
78 strategy using  $\Delta GL$  rabies viruses (Chatterjee et al., 2018). However, in the presence of TEVP,  
79 the destabilization domain would be cleaved from the C terminus of the nucleoprotein, which  
80 therefore would not be degraded and allow normal levels of transcription and replication of the  
81 virus. In the words of Ciabatti et al., "the virus should be able to transcribe and replicate only when  
82 TEVP is present" (Ciabatti et al., 2017). So far, so good, and most of the results reported in their  
83 paper are logically consistent with a virus that is conditionally deficient in nucleoprotein  
84 production.

85 However, Ciabatti et al. then went on to show that their "SiR" viruses could be used for  
86 monosynaptic tracing *in vivo* with no need for TEVP expression at all: the viruses could simply be  
87 complemented by G expression in the starting cell population and efficiently spread to putatively  
88 presynaptic neurons. In their lack of dependence on TEVP expression, the SiR viruses behaved  
89 as if they were simply first-generation,  $\Delta G$  rabies viruses. This was a paradoxical result: the  
90 modified nucleoprotein, which was supposed to require TEVP-mediated removal of the  
91 destabilization domain in order to accumulate in infected cells and allow viral replication, appeared  
92 not to in the starting cells *in vivo*. Furthermore, despite this apparent ability to replicate perfectly  
93 well despite the C-terminal degron that was intended to prevent it from doing so, the virus  
94 appeared not to kill neurons: Ciabatti et al. found many surviving putatively-presynaptic neurons  
95 at three weeks after rabies virus injection.

96 We hypothesized an alternative explanation for these results, as follows.

97 As an incidental finding from the control experiments in our paper on second-generation  
98 ( $\Delta GL$ ) rabies virus (Chatterjee et al., 2018), we discovered that even first-generation ( $\Delta G$ ) virus  
99 could apparently be made significantly less toxic simply by switching the transgene that it encodes  
100 from some "normal" one like the tdTomato gene to the coding sequence for Cre recombinase.  
101 Following an initial die-off of a fraction of neurons infected with a Cre-encoding  $\Delta G$  virus, a  
102 comparably large fraction survived for four months, the longest we followed them, with modest

103 physiological changes in some(Chatterjee et al., 2018). These findings suggested a "quick and  
104 dirty" way of making a less-toxic, but by no means completely nontoxic, monosynaptic tracing  
105 system: use a first-generation,  $\Delta G$  rabies virus encoding a recombinase and do the experiments  
106 in reporter mice.

107 We hypothesized that Ciabatti et al. had inadvertently done exactly that. Specifically,  
108 because rhabdoviruses have high mutation rates(Combe and Sanjuan, 2014; Holland et al., 1992;  
109 Holmes et al., 2002; Jenkins et al., 2002; Steinhauer et al., 1989; Steinhauer and Holland, 1987),  
110 and because production of high-titer rabies virus stocks for *in vivo* injection typically involves  
111 repeated passaging on complementing cell lines(Osakada and Callaway, 2013; Wickersham and  
112 Sullivan, 2015; Wickersham et al., 2010), which affords ample opportunity for accumulation of  
113 mutants with a selective replication advantage, we hypothesized that the viruses that Ciabatti et  
114 al. had actually ended up with and used for their transsynaptic tracing experiments were mutants  
115 with premature stop codons at or near the end of the native nucleoprotein gene and before the  
116 sequence of the destabilization domain. If so, their "SiR-CRE" virus would be a simple first-  
117 generation,  $\Delta G$  rabies viral vector expressing Cre. Because we have shown that such a virus can  
118 leave a large percentage of infected cells alive, the presence of surviving cells even at long time  
119 points would have misled the authors into concluding that they had developed a new kind of rabies  
120 virus that did not kill cells but that could be used for monosynaptic tracing by simple  
121 complementation by G alone.

122 Here we show that our hypothesis was correct: in both of the two SiR viruses to which we  
123 had access, the vast majority of viral particles had mutations in their genomes that caused the  
124 complete loss of the intended C-terminal addition to the nucleoprotein, so that they were just  
125 ordinary first-generation  $\Delta G$  rabies viral vectors. We also tested the SiR-CRE virus *in vivo* and  
126 found that it was rapidly cytotoxic.

## 127 128 **RESULTS**

129  
130 We analyzed samples of two viruses sent directly from the Tripodi lab to MIT in September  
131 2017, two months after the publication in which they were introduced(Ciabatti et al., 2017):  
132 "EnvA/SiR-CRE" (made from genome plasmid Addgene 99608, pSAD-F3-NPEST-iCRE-2A-  
133 mCherryPEST) and "EnvA/SiR-FLPo" (made from genome plasmid Addgene 99609, pSAD-  
134 F3-NPEST-FLPo-2A-mCherryPEST). These two viruses, like all of the other rabies viruses  
135 described in Ciabatti et al., have the SAD B19 strain of rabies virus as their parent strain. Both of  
136 the viruses sent by the Tripodi lab had been packaged with the avian and sarcoma virus subgroup  
137 A envelope glycoprotein ("EnvA") for targeted infection of cells expressing EnvA's receptor,  
138 TVA(Wickersham et al., 2007b).

139 For comparison with the two SiR viruses, we made control viruses from our own  
140 laboratory: three first-generation vectors RV $\Delta G$ -4Cre(Chatterjee et al., 2018), RV $\Delta G$ -4FLPo (see  
141 Methods), and RV $\Delta G$ -4mCherry(Weible et al., 2010), and two second-generation vectors RV $\Delta GL$ -  
142 4Cre and RV $\Delta GL$ -4FLPo(Chatterjee et al., 2018). All of these viruses are also on the SAD B19  
143 background, like the SiR viruses. For each of the four viruses from our laboratory, we made one  
144 preparation packaged with the EnvA envelope protein and one preparation packaged with the  
145 native rabies virus (SAD B19 strain) glycoprotein (denoted as "B19G").

## 146 147 **Anti-nucleoprotein immunostaining**

148  
149 We infected reporter cell lines with serial dilutions of the ten viruses described above (the  
150 two EnvA-enveloped SiR viruses and the eight from our own lab:  $\Delta G$  vs.  $\Delta GL$ , Cre vs. FLPo, EnvA  
151 vs. B19G). Three days later, we immunostained the cells for rabies virus nucleoprotein and  
152 imaged the cells with confocal microscopy.

153 As seen in Figure 1, we found that the cells infected with the SiR viruses looked very  
154 similar to those infected with the first-generation,  $\Delta G$  viruses. Notably, the viral nucleoprotein,  
155 which in the SiR viruses is supposed to be destabilized and degrade rapidly in the absence of  
156 TEVP, accumulated in the SiR-infected cells in clumpy patterns that looked very similar to those  
157 in the cells infected with the first-generation,  $\Delta G$  viruses. By contrast, the cells infected with the  
158 second-generation,  $\Delta GL$  viruses, which we have shown is actually attenuated and really does not  
159 kill cells (Chatterjee et al., 2018), did not show any such nucleoprotein accumulation, clumped or  
160 otherwise, only punctate labeling presumably indicating isolated viral particles or post-infection  
161 uncoated viral particles (ribonucleoprotein complexes) that really are not replicating.

162

### 163 **Longitudinal two-photon imaging *in vivo***

164

165 To see whether the SiR viruses kill neurons in the brain, we conducted longitudinal two-  
166 photon imaging *in vivo* of virus-labeled neurons in visual cortex of tdTomato reporter mice, as we  
167 had done previously to demonstrate the nontoxicity of second-generation rabies virus (Chatterjee  
168 et al., 2018) (Figure 2). Because the SiR viruses were EnvA-enveloped, we first injected a  
169 lentivirus expressing EnvA's receptor TVA, then one week later we injected either SiR-CRE or  
170 one of two EnvA-enveloped viruses made in our laboratory: the first-generation virus RV $\Delta G$ -  
171 4Cre(EnvA) or the second-generation virus RV $\Delta GL$ -4Cre(EnvA). Beginning one week after rabies  
172 virus injection, we imaged labeled neurons at the injection site every seven days for four weeks,  
173 so that we could track the fate of individual neurons over time.

174 As we have found in our previous work (Chatterjee et al., 2018), our second-generation  
175 virus RV $\Delta GL$ -4Cre did not kill neurons to any appreciable degree: all but a tiny handful of the  
176 neurons labeled by this virus at 7 days after injection were still present three weeks later in all  
177 mice. Again as we have found previously (Chatterjee et al., 2018), our first-generation virus RV $\Delta G$ -  
178 4Cre did kill neurons, but by no means all of them.

179 However, we found that the putatively nontoxic SiR-CRE caused a steep loss of neurons  
180 much more pronounced than even our first-generation virus did. By 14 days after injection, 70%  
181 of cells seen at 7 days were dead; by 28 days, 81% were.

182 There is a possible confound from our use of the tdTomato reporter line Ai14 (which we  
183 used primarily because we already had large numbers of mice of this line): because SiR-CRE is  
184 actually "SiR-iCRE-2A-mCherryPEST", designed to coexpress mCherry (with an added C-  
185 terminal PEST domain intended to destabilize it, as for the nucleoprotein) along with Cre, it is  
186 conceivable that some of the SiR-CRE-labeled red cells at 7 days were only expressing mCherry  
187 and not tdTomato. If the destabilized mCherry were expressed only transiently, as Ciabatti et al.  
188 intended it to be (Ciabatti et al., 2017), and a significant fraction of SiR-CRE virions had mutations  
189 in the Cre gene so they did not express functioning Cre, then it is possible that some of the red  
190 cells seen at 7 days were labeled only with mCherry that stopped being visible by 14 days, so  
191 that it would only look like those cells had died.

192 We viewed this alternative explanation as unlikely, because Ciabatti et al. injected SiR-  
193 CRE in an EYFP reporter line and found no cells labeled only with mCherry and not EYFP at 6  
194 days and 9 days postinjection (see Figure S4 in Ciabatti et al.). Nevertheless, we addressed this  
195 potential objection in several ways.

196 First, we sequenced the transgene inserts (iCre-P2A-mCherryPEST) of 21 individual SiR-  
197 CRE viral particles (see Supplementary File S1) and found that only 2 out of 21 had mutations in  
198 the Cre gene, suggesting that there would not have been a large population of cells only labeled  
199 by mCherry and not tdTomato.

200 Second, we simply redid some of the SiR-CRE injections and imaging in a different  
201 reporter line: Ai35, expressing Arch-EGFP-ER2 after Cre recombination (Madisen et al., 2012)  
202 (Jax 012735). Although we found that the membrane-localized green fluorescence from the Arch-  
203 EGFP-ER2 fusion protein unfortunately was too dim and diffuse at 7 days postinjection for us to

204 get clear images, we were able to obtain clear images of a number of cells at 11 days  
205 postinjection. We found that 46% of them had disappeared only three days later (see  
206 Supplementary Video S1 and Supplementary Figure S2), and 86% had disappeared by 28 days  
207 postinjection, consistent with a rapid die-off. Furthermore, we found that the red fluorescence in  
208 Ai35 mice, which was due only to the mCherry expressed by the virus, was much dimmer than  
209 the red fluorescence in Ai14 mice at the same time point of 7 days postinjection and with the same  
210 imaging parameters (see Supplementary Figure S1): the mean intensity was 45.86 (arbitrary  
211 units, or a.u.) in Ai14 but only 16.29 a.u. in Ai35. This is consistent with the published findings that  
212 tdTomato is a much brighter fluorophore than mCherry(Shaner et al., 2004), particularly with two-  
213 photon excitation(Drobizhev et al., 2011), and it is also consistent with Ciabatti et al.'s addition of  
214 a destabilization domain to mCherry's C-terminus (although we also observed that there were still  
215 red fluorescent cells present at week 4 in Ai35 (data not shown)). We therefore redid the counts  
216 of labeled cells in our Ai14 datasets to include only cells with fluorescence at 7 days of more than  
217 32.33 a.u., the midpoint of the mean intensities in Ai35 versus Ai14 mice, in order to exclude  
218 neurons that might have been labeled with mCherry alone. As seen in Figure S3, restricting the  
219 analysis to the cells that were brightest at 7 days (and therefore almost certainly not labeled with  
220 just mCherry instead of either just tdTomato or a combination of both mCherry and tdTomato)  
221 made no major difference: 70.0% of SiR-labeled neurons had disappeared by 14 days, and 80.8%  
222 were gone by 21 days.

223

## 224 **Sequencing of viral genomes: Sanger sequencing**

225

226 In order to directly test our hypothesis that the SiR viruses had developed premature stop  
227 codons removing the PEST domain in a majority of viral particles, we sequenced the genomes of  
228 a large number of individual viral particles using two different techniques.

229 First, we used ordinary Sanger sequencing to determine the sequence in the vicinity of  
230 the end of the nucleoprotein gene for 50 - 51 individual viral particles of each of the two SiR  
231 viruses and for a first-generation virus from our own laboratory, RV $\Delta$ G-4mCherry (Figure 3). We  
232 ensured the isolation of individual viral genomes by using a primer with a random 8-base index  
233 for the reverse transcription step, so that the cDNA copy of each RNA viral genome would have  
234 a unique index. Following the reverse transcription step, we amplified the genomes by standard  
235 PCR, cloned the amplicons into a generic plasmid, transformed this library into E.coli and  
236 sequenced plasmids purified from individual colonies. As shown in Figure 3, the results confirmed  
237 that our hypothesis was correct.

238 In the SiR-CRE sample, 100% of the 51 sequenced viral particles had lost the PEST  
239 domain. 50 out of the 51 had the same point mutation in the linker between the end of the native  
240 nucleoprotein gene and the TEVP cleavage site, converting a glycine codon (GGA) to a stop  
241 codon (TGA) so that the only modification to the C-terminus of the nucleoprotein was the addition  
242 of two amino acids (a glycine and a serine). The one sequenced viral particle that did not have  
243 this point mutation had a single-base insertion in the second-to-last codon of the native  
244 nucleoprotein gene, frameshifting the rest of the sequence and resulting in 15 amino acids of  
245 nonsense followed by a stop codon before the start of the PEST domain sequence.

246 In the SiR-FLPo sample, the situation was somewhat more interesting: out of 50  
247 sequenced viral particles, 18 had the same stop codon that was found in almost all genomes in  
248 the Cre sample, while another 28 had a different stop codon three amino acids upstream,  
249 immediately at the end of the native nucleoprotein gene (converting a serine codon (TCA) to a  
250 stop codon (TGA)). Four viral particles had no mutations in the sequenced region. Thus 46/50  
251 (92%) of the SiR-FLPo viral particles sequenced had lost the PEST domain.

252 In contrast, in the first-generation virus from our own lab, RV $\Delta$ G-4mCherry, none of the 50  
253 viral particles sequenced had mutations in the sequenced region on the end of the nucleoprotein  
254 gene.

255  
256  
257  
258  
259  
260  
261  
262  
263  
264  
265  
266  
267  
268  
269  
270  
271  
272  
273  
274  
275  
276  
277  
278  
279  
280  
281  
282  
283  
284  
285  
286  
287  
288  
289  
290  
291  
292  
293  
294  
295  
296  
297  
298  
299  
300  
301  
302  
303  
304  
305

## Sequencing of viral genomes: Single-molecule, real-time (SMRT) sequencing

As a second approach to analyzing the mutations present in the SiR viruses, we employed an advanced large-scale sequencing technology: single-molecule, real-time ("SMRT") sequencing, which provides independent sequences of tens of thousands of individual single molecules in a sample in parallel (Figure 4). The results from this advanced sequencing method were quite consistent with the results from the Sanger sequencing presented above. As with the sample preparation for Sanger sequencing, we included a random (10 bases in this case) index in the reverse transcription primer, again so that the cDNA copy of each RNA viral genome molecule would be labeled with a unique index.

SMRT sequencing entails circularization of the DNA molecules and multiple consecutive passes around the resulting circular molecule, with the redundancy provided by this repeated sequencing of each position increasing the signal to noise ratio and statistical significance of the results. The numbers presented in Figure 4 and below use the default of including only clones that had at least three reads of each base ("circular consensus sequence 3", or "CCS3" in Supplementary File S3). Using the increasingly stringent criteria of requiring either five or eight reads per base (CCS5 or CCS8) reduced the numbers of qualifying genomes in all cases and changed the percentages slightly but gave overall very similar results. Because read accuracy for SMRT sequencing is  $\geq 98\%$  (circular consensus sequencing with 3 passes (see <https://www.mscience.com.au/upload/pages/pacbio/technical-note---experimental-design-for-targeted-sequencing.pdf>), we used a conservative threshold of 2% frequency of any given point mutation position in order to screen out false positives. Also to be very conservative, for Figure 4 we ignored all apparent frame shifts caused by insertions and deletions, because insertions in particular are prone to false positives with SMRT sequencing (Carneiro et al., 2012). See Supplementary File S3 for details, including details of frameshifts due to insertions; Supplementary Files S4-S6 contain the sequences of the PCR amplicons that would be expected based on published sequences of the three viruses. In summary:

As a control, we used a virus from our own laboratory, RV $\Delta$ G-4Cre (Chatterjee et al., 2018) (see Addgene #98034 for reference sequence). Out of 17,978 sequenced genomes of this virus, we found no mutations above threshold frequency at the end of N. We did find that 1,706 viral particles (9.49%) had a nonsynonymous mutation (TCT (Ser)  $\rightarrow$  ACT (Thr)) farther up in N at amino acid position 419 (31 amino acids upstream of the end of the 450-aa native protein). We do not know if this mutation is functionally significant, although it is not present in CVS N2c (Wirblich and Schnell, 2011), HEP-Flury (Tao et al., 2010), ERA (Prehaud et al., 2003), or Pasteur strains (Genbank GU992320), so these particles may effectively be N-knockouts that were propagated by coinfection with virions with intact N (see Discussion for more on "defective interfering particles").

For the SiR-CRE virus, out of 22,205 viral genomes sequenced, 22,032 had the premature stop codon (GGA  $\rightarrow$  TGA) in the linker between the native nucleoprotein gene and the TEVP cleavage site sequence. In other words, even without including frameshifts, at least 99.22% of the individual viral particles in the SiR-CRE sample were simply first-generation  $\Delta$ G vectors.

For the SiR-FLPo virus, out of 17,086 viral genomes sequenced, 5,979 had the stop codon (GGA  $\rightarrow$  TGA) in the linker, 8,624 had the stop codon (TCA  $\rightarrow$  TGA) at the end of N, and a further 28 had a different stop codon (TCA  $\rightarrow$  TAA) at the same position at the end of N. Of these, 305 viral particles had premature stop codons at both of these two positions, so that the total number of viral particles with one or both stop codons immediately before the PEST domain was  $(8624 + 5979 + 28 - 305) = 14,326$ . In other words, at least 83.85% of the individual viral particles in the SiR-FLPo sample were simply first-generation  $\Delta$ G vectors, with the only modification of the nucleoprotein being either two amino acids added to, or one amino acid lost from, the C-terminus.

## 306 DISCUSSION

307  
308 Although many of the results presented in Ciabatti et al.(Ciabatti et al., 2017) seemed plausible,  
309 the results showing transsynaptic tracing did not. The degron fused to the C terminus of the  
310 nucleoprotein was supposed to require removal by TEV protease in order to allow replication of  
311 the SiR virus, but the viruses seemed to replicate fine *in vivo* with no TEV protease present at all.  
312 Here we have shown that the likely explanation is that the SiR viruses have simply lost the  
313 intended C-terminal modification of the nucleoprotein.

314 We do not believe that the escape of the SiR viruses from the modification intended to  
315 attenuate them was a fluke due to bad luck with a couple of batches, for the following reasons.  
316 First, both of the two SiR virus samples to which we had access had independently developed  
317 mutations causing loss of the intended C-terminal addition to the nucleoprotein, and, because the  
318 two samples were of completely different viruses (one was SiR-CRE; the other SiR-FLPo), the  
319 two viruses clearly had each independently escaped the intended modification rather than both  
320 deriving from a single compromised parental stock. Second, the mutation profiles of the two  
321 viruses were quite different: whereas the SiR-CRE sample had the same point mutation in nearly  
322 100% of its viral particles, only a minority of the SiR-FLPo particles had that particular mutation,  
323 with the majority having a different point mutation three codons away that had the same result.  
324 This suggests that any of the many opportunities for removing the C-terminal addition — creation  
325 of a premature stop codon at any one of a number of sites, a frameshift mutation anywhere in the  
326 vicinity, or any combination of these — can be exploited by a given batch of virus, greatly  
327 increasing the probability of such mutants arising and dominating the population. Third, the  
328 apparently paradoxical transsynaptic tracing results described by Ciabatti et al. — namely that  
329 viral replication and spread occurred *in vivo* in the absence of TEVP, which should have been  
330 required — are difficult to explain unless the viral preparations used for those experiments  
331 harbored exactly the kind of mutations we found in the two preparations to which we did have  
332 access. We would therefore predict that any SiR preparation that has been found to be capable  
333 of efficient transsynaptic spread under the conditions described in Ciabatti et al. will be found  
334 either to consist primarily of "escape mutants" similar to those that we have described here or, as  
335 we discuss below, to have developed such mutations *in vivo*.

336 It may be that, given sufficient care and expertise, it is possible under some circumstances  
337 to make SiR virus with the intended C-terminal addition intact. This to some extent is beside the  
338 point. What we would predict, to restate the above, is that any SiR virus that does retain the  
339 intended C-terminal modification to the nucleoprotein would be incapable of appreciable  
340 transsynaptic spread under the conditions Ciabatti et al. described, i.e., in the absence of TEVP.  
341 Whether such a virus would be capable of significant transsynaptic spread even in the *presence*  
342 of TEVP is unclear, but there are no results in Ciabatti et al. that indicate this.

343 However, even if a pure SiR viral preparation were able to be made and sequence-verified  
344 before injection, the kinds of reversion mutations that we have shown here could just as easily  
345 occur *in vivo* as the virus replicated within the starting postsynaptic neurons, so that the virus  
346 would once again revert to the toxic, unmodified  $\Delta G$  version. These mutations *in situ* would be  
347 very difficult to detect, short of extracting the viral genomes from labeled cells and sequencing  
348 them.

349 Given that the SiR samples that we analyzed were in fact just first-generation  $\Delta G$  viruses,  
350 and the viruses used for at least the otherwise-inexplicable transsynaptic tracing experiments in  
351 Ciabatti et al. probably were as well, why did Ciabatti et al. find, in postmortem tissue, cells labeled  
352 by SiR-CRE that had survived for weeks? The answer may be that, as we have shown in  
353 Chatterjee et al.(Chatterjee et al., 2018) and again here (Figure 2), a first-generation rabies viral  
354 vector expressing Cre, while it kills a large fraction of infected neurons, can also leave a similarly  
355 large fraction of labeled cells alive for at least months and perhaps indefinitely (and Gomme et al.  
356 found that a replication-competent rabies virus expressing Cre also allowed long-term survival of

357 some neurons(Gomme et al., 2012)). Interestingly, although we have not done similarly  
358 painstaking quantitative studies of a first-generation ( $\Delta G$ ) virus expressing FLpo, it appears that  
359 the FLpo-expressing version is not comparably nontoxic (Supplementary Figure S4). This is still  
360 consistent with Ciabatti et al.'s results, however, because they provided no evidence that their  
361 SiR-FLP (which was used only for Figure S6 in their paper) left cells alive for any long durations.

362 As to our initially surprising incidental finding in Chatterjee et al. (and again see also Figure  
363 2 in the present paper) that a first-generation,  $\Delta G$  rabies virus encoding Cre, in stark contrast to  
364 similar ones encoding tdTomato(Chatterjee et al., 2018) or EGFP(Wickersham et al., 2007a), can  
365 leave a large fraction of labeled cells alive even for months after infection, there are several  
366 possible explanations.

367 The most obvious explanation for why a simple  $\Delta G$  rabies virus encoding Cre can leave  
368 many cells alive is that Cre is for some reason less toxic than tdTomato, EGFP, channelrhodopsin,  
369 or other payloads. It might be, for example, that the nuclear localization of Cre causes its rapid  
370 accumulation to activate less of an immune response than does that of the cytoplasmic or  
371 membrane-bound proteins like EGFP. This would suggest that addition of a nuclear localization  
372 signal to, e.g., tdTomato would render a  $\Delta G$  vector encoding it to be less toxic. We have not tested  
373 this possibility, but our finding that a  $\Delta G$  vector encoding FLpo, which is also nuclearly-localized,  
374 does not seem to share the reduced toxicity of RV $\Delta G$ -Cre (Supplementary Figure S4) might  
375 appear to argue against this explanation.

376 It may be that the primary reason for the reduced toxicity of the first-generation  $\Delta G$  vectors  
377 encoding Cre is, fittingly, the same high mutation rate that we have highlighted in this paper. We  
378 have of course shown in Chatterjee et al.(Chatterjee et al., 2018) that a second-generation,  $\Delta GL$   
379 virus, which has the polymerase gene L deleted in addition to the glycoprotein gene G, leaves  
380 cells alive indefinitely. However, any first-generation ( $\Delta G$ ) vector that develops a frameshift or  
381 point mutation knocking out L is in practice a  $\Delta GL$  vector. Indeed, a stop codon or frameshift  
382 mutation in the nucleoprotein or phosphoprotein genes is likely to have a similar effect as one in  
383 L (and it might be that the Ser419Thr mutation that we found in 9.49% of our RV $\Delta G$ -4Cre virions  
384 is just such a knockout mutation of N). Together with the high mutation rate of rabies virus, this  
385 means that, within every preparation of first-generation rabies virus there is almost guaranteed to  
386 be a large population of *de facto* second-generation variants mixed in with the intended first-  
387 generation population and propagated in the producer cells by complementation by the first-  
388 generation virions. While any rabies virus preparation (whether made in the laboratory or  
389 occurring naturally) can be expected to contain a large fraction of such knockout (whether by  
390 substitution, frameshift, or deletion) mutants (classically known as "defective interfering particles"  
391 (Clark et al., 1981; Kawai and Matsumoto, 1977; Wiktor et al., 1977); the higher the multiplicity of  
392 infection when passaging the virus, the higher the proportion of such freeloading viral particles  
393 typically will be), this would not necessarily be noticed in the case of a virus encoding some more  
394 typical transgene product such as EGFP or tdTomato, because the expression levels of these by  
395 the knockout mutants would be too low to label cells clearly (see Figure 1 in Chatterjee et  
396 al.(Chatterjee et al., 2018)). However, with Cre as the transgene, these "second-generation"  
397 particles can label neurons, which would then not die off, whereas the ones infected by the actual  
398 first-generation particles (i.e., those that have all their viral genes intact apart from the deleted G)  
399 presumably do die. This explanation would predict that the percentage of neurons surviving  
400 infection with a rabies virus encoding Cre (or presumably FLpo) will depend on the particular viral  
401 preparation that is injected, with some presumably having a greater fraction of knockout particles  
402 than others.

403 Finally, generalizing from our findings in the specific case we have examined here: we  
404 suggest that the SiR approach, or any other such attempt to attenuate a virus by addition rather  
405 than deletion, and particularly by addition to the C terminus of a viral protein, is an inherently  
406 unstable strategy. Any such modification can so easily be lost by mutation (by creation of either  
407 a stop codon or a frameshift), and any mutant that loses it will immediately possess a replication



408 advantage over the attenuated virions so can quickly dominate the population, as we have shown  
409 happened with the SiR viruses.

410

411

## 412 **METHODS**

413

### 414 **Cloning**

415 Lentiviral transfer plasmids were made by cloning, into pCSC-SP-PW-GFP(Marr et al., 2004)  
416 (Addgene #12337), the following components:

417

418 the CAG promoter(Niwa et al., 1991) and a Cre-dependent "FLEX"(Atasoy et al., 2008) construct  
419 consisting of pairs of orthogonal lox sites flanking a back-to-back fusion of the gene for  
420 mTagBFP2(Subach et al., 2011) immediately followed by the reverse-complemented gene for  
421 mCherry(Shaner et al., 2004), to make the Cre reporter construct pLV-CAG-FLEX-BFP-  
422 (mCherry)';

423

424 the CAG promoter(Niwa et al., 1991) and a Flp-dependent "FLEX"(Atasoy et al., 2008) construct  
425 consisting of pairs of orthogonal FRT sites(Turan et al., 2010) flanking a back-to-back fusion of  
426 the gene for mTagBFP2(Subach et al., 2011) immediately followed by the reverse-complemented  
427 gene for mCherry(Shaner et al., 2004), to make the Flp reporter construct pLV-CAG-F14F15S-  
428 BFP-(mCherry)';

429

430 the ubiquitin C promoter from pUB-GFP(Matsuda and Cepko, 2004) (Addgene 11155) and the  
431 long isoform of TVA(Bates et al., 1993) to make the TVA expression vector pLV-U-TVA950.

432

433 The first-generation vector genome plasmid pRV $\Delta$ G-4FLPo was made by cloning the FLPo  
434 gene(Raymond and Soriano, 2007) into pRV $\Delta$ G-4Cre.

435

436 The above novel plasmids have been deposited with Addgene with accession numbers 115234,  
437 115235, 115236, and 122050.

438

### 439 **Production of lentiviral vectors**

440 Lentiviral vectors were made by transfection of HEK-293T/17 cells (ATCC 11268)  
441 as described(Wickersham et al., 2015) but with the use of the vesicular stomatitis virus envelope  
442 expression plasmid pMD2.G (Addgene 12259) for all vectors except for LV-U-TVA950(B19G),  
443 which was made using the rabies virus envelope expression plasmid pCAG-  
444 B19GVSVGCD(Wickersham et al., 2015). Lentiviral vectors expressing fluorophores were titered  
445 as described(Sullivan and Wickersham, 2015); titers of LV-U-TVA950(VSVG) and LV-U-  
446 TVA950(B19G) were assumed to be approximately the same as those of the fluorophore-  
447 expressing lentiviral vectors produced in parallel.

448

### 449 **Production of titering cell lines**

450 To make reporter cell lines, HEK-293T/17 cells were infected with either pLV-CAG-FLEX-BFP-  
451 (mCherry)' or pLV-CAG-F14F15S-BFP-(mCherry)' at a multiplicity of infection of 100 in one 24-  
452 well plate well each. Cells were expanded to 2x 15cm plates each, then sorted on a FACS Aria  
453 to retain the top 10% most brightly blue fluorescent cells. After sorting, cells were expanded again  
454 to produce the cell lines 293T-FLEX-BC and 293T-F14F15S-BC, reporter lines for Cre and FLPo  
455 activity, respectively. TVA-expressing versions of these two cell lines were made by infecting one  
456 24-well plate well each with LV-U-TVA950(VSVG) at an MOI of approximately 100; these cells  
457 were expanded to produce the cell lines 293T-TVA-FLEX-BC and 293T-TVA-F14F15S-BC.

458

## 459 **Production and titering of rabies viruses**

460 RV $\Delta$ G-4Cre and RV $\Delta$ GL-4Cre were produced as described(Chatterjee et al., 2018; Wickersham  
461 and Sullivan, 2015), with EnvA-enveloped viruses made by using cells expressing EnvA instead  
462 of G for the last passage. Titering and infection of cell lines with serial dilutions of viruses was as  
463 described(Wickersham et al., 2010), with the 293T-TVA-FLEX-BC and 293T-TVA-F14F15S-BC  
464 lines used for B19G-enveloped viruses and the 293T-TVA-FLEX-BC and 293T-TVA-F14F15S-  
465 BC used for the EnvA-enveloped viruses. For the *in vivo* injections, the three EnvA-enveloped,  
466 Cre-encoding viruses were titered side by side, and the two higher-titer viruses were diluted so  
467 that the final titer of the injected stocks of all three viruses were approximately equal at 1.39E9  
468 infectious units per milliliter.

## 469 **Immunostaining**

471 Reporter cells (see above) plated on coverslips coated in poly-L-lysine (Sigma) were infected with  
472 serial dilutions of RV $\Delta$ G-4Cre and RV $\Delta$ GL-4Cre as described(Wickersham et al., 2010). Three  
473 days after infection, cells were fixed with 2% paraformaldehyde, washed repeatedly with  
474 blocking/permeabilization buffer (0.1% Triton-X (Sigma) and 1% bovine serum albumin (Sigma)  
475 in PBS), then labeled with a blend of three FITC-conjugated anti-nucleoprotein monoclonal  
476 antibodies (Light Diagnostics Rabies DFA Reagent, EMD Millipore 5100) diluted 1:100 in blocking  
477 buffer for 30 minutes, followed by further washes in blocking buffer, then finally briefly rinsed with  
478 distilled water and air-dried before mounting the coverslips onto microscope slides with Prolong  
479 Diamond Antifade (Thermo P36970) mounting medium. Images of wells at comparable  
480 multiplicities of infection (~0.1) were collected on a Zeiss 710 confocal microscope.

## 481 **Virus injections and surgery**

483 All experimental procedures using mice were conducted according to NIH guidelines and were  
484 approved by the MIT Committee for Animal Care (CAC). Mice were housed 1-4 per cage under a  
485 normal light/dark cycle for all experiments.

486  
487 Adult (>9 weeks, male and female) Cre-dependent tdTomato reporter Ai14(Madisen et al., 2010)  
488 (Jackson Laboratory #007908) or Arch-EGFP reporter Ai35D(Madisen et al., 2012) (Jackson  
489 Laboratory # 012735) mice were anesthetized with isoflurane (4% in oxygen) and  
490 ketamine/xylazine (100mg/kg and 10mg/kg respectively, i.p.). Mice were given preemptive  
491 analgesics buprenorphine (0.1 mg/kg s.q.) and meloxicam (2 mg/kg s.q.) as well as eye ointment  
492 (Puralube); the scalp was then shaved and mice mounted on a stereotaxic instrument (Stoelting  
493 Co.) with a hand warmer (Heat Factory) underneath the animal to maintain body temperature.  
494 Following disinfection with povidone-iodine, an incision was made in the scalp, and a 3 mm  
495 craniotomy was opened over primary visual cortex (V1). 300 nl of LV-U-TVA950(B19G) (see  
496 above) was injected into V1 (-2.70 mm AP, 2.50 mm LM, -0.26 mm DV; AP and LM stereotaxic  
497 coordinates are with respect to bregma; DV coordinate is with respect to brain surface) using a  
498 custom injection apparatus comprised of a hydraulic manipulator (MO-10, Narishige) with  
499 headstage coupled via custom adaptors to a wire plunger advanced through pulled glass  
500 capillaries (Wiretrol II, Drummond) back-filled with mineral oil and front-filled with virus solution.  
501 Glass windows composed of a 3mm-diameter glass coverslip (Warner Instruments CS-3R) glued  
502 (Optical Adhesive 61, Norland Products) to a 5mm-diameter glass coverslip (Warner Instruments  
503 CS-5R) were then affixed over the craniotomy with Metabond (Parkell). Seven days after injection  
504 of the lentiviral vector, the coverslips were removed and 300 nl of one of the three EnvA-  
505 enveloped rabies viral vectors (with equalized titers as described above) was injected at the same  
506 stereotaxic coordinates. Coverslips were reapplied and custom stainless steel headplates  
507 (eMachineShop) were affixed to the skulls around the windows.

## 508 ***In vivo* two-photon imaging and image analysis**

510 Beginning seven days after injection of each rabies virus and continuing every seven days up to  
511 a maximum of four weeks following rabies virus injection, the injection sites were imaged on a  
512 Prairie/Bruker Ultima IV In Vivo two-photon microscope driven by a Spectra Physics Mai-Tai Deep  
513 See laser with a mode locked Ti:sapphire laser emitting at a wavelength of 1020 nm for tdTomato  
514 (or mCherry) or 920 nm for EGFP. Mice were reanesthetized and mounted via their headplates  
515 to a custom frame, again with ointment applied to protect their eyes and with a handwarmer  
516 maintaining body temperature. One field of view was chosen in each mouse in the area of maximal  
517 fluorescent labelling. The imaging parameters were as follows: image size 512 X 512 pixels (282.6  
518  $\mu\text{m} \times 282.6 \mu\text{m}$ ), 0.782 Hz frame rate, dwell time 4.0  $\mu\text{s}$ , 2x optical zoom, Z-stack step size 1  $\mu\text{m}$ .  
519 Image acquisition was controlled with Prairie View 5.4 software. Laser power exiting the 20x  
520 water-immersion objective (Zeiss, W plan-apochromat, NA 1.0) varied between 20 and 65 mW  
521 depending on focal plane depth (Pockel cell value was automatically increased from 450 at the  
522 top section of each stack to 750 at the bottom section). For the example images of labeled cells,  
523 maximum intensity projections (stacks of 150-400  $\mu\text{m}$ ) were made with Fiji software. Cell counts  
524 was performed with the ImageJ Cell Counter plugin. When doing cell counting, week 1 tdTomato  
525 labelled cells were defined as a reference; remaining week 1 cells were the same cells at later  
526 time point that align with week 1 reference cells but the not-visible cells at week 1 (the dead cells).  
527 Plots of cell counts were made with Origin 7.0 software (OriginLab, Northampton, MA). For the  
528 thresholded version of this analysis (Supplementary Figure S3), in order to exclude cells that  
529 could possibly have been labeled only with mCherry in the SiR-CRE group, only cells with  
530 fluorescence intensity greater than the average of the mean red fluorescence intensities of cells  
531 imaged in Ai35 versus Ai14 mice at the same laser power at 1020 nm at 7 days postinjection  
532 (32.33 a.u.) were included in the population of cells tracked from 7 days onward.

533

### 534 **Sanger sequencing**

535 RNA viral genomes were extracted from two Tripodi lab (EnvA/ SiR-CRE and EnvA/Sir-FLPo) and  
536 one Wickersham lab (RV $\Delta$ G-4mCherry) rabies virus samples using a Nucleospin RNA kit  
537 (Macherey-Nagel, Germany) and treated with DNase I (37°C for 1 hour, followed by 70°C for 5  
538 minutes). Extracted RNA genomes were converted to complementary DNA using an AccuScript  
539 PfuUltra II RT-PCR kit (Agilent Technologies, USA) at 42°C for 2 hours with the following  
540 barcoded primer annealing to the rabies virus leader sequence:

541 Adapter\_N8\_leader\_fp: TCAGACGATGCGTCATGCNNNNNNNACGCTTAACAACCAGATC

542

543 cDNA sequences from the leader through the first half of the rabies virus P gene were amplified  
544 using Platinum SuperFi Green Master Mix (Invitrogen (Thermo Fisher), USA) with cycling  
545 conditions as follows: denaturation at 98°C for 30 seconds, followed by 25 cycles of amplification  
546 (denaturation at 98°C for 5 seconds and extension at 72°C for 75 seconds), with a final extension  
547 at 72°C for 5 minutes, using the following primers:

548 pEX\_adapter\_fp: CAGCTCAGACGATGCGTCATGC

549 Barcode2\_P\_rp: GCAGAGTCATGTATAGCTTCTTGAGCTCTCGGCCAG

550

551 The ~2kb PCR amplicons were extracted from an agarose gel, purified with Nucleospin Gel and  
552 PCR Clean-up (Macherey-Nagel, Germany), and cloned into pEX-A (Eurofins Genomics, USA)  
553 using an In-Fusion HD Cloning Kit (Takara Bio, Japan). The cloned plasmids were transformed  
554 into Stellar competent cells (Takara Bio, Japan), and 200 clones per rabies virus sample were  
555 isolated and purified for sequencing. For each clone, the index and the 3' end of the N gene were  
556 sequenced until sequencing data was collected for over fifty clones per sample: 51 clones from  
557 SiR-CRE(EnvA), 50 from SiR-FLPo(EnvA), and 51 from RV $\Delta$ G-4mCherry(EnvA). Although viral  
558 samples may contain plasmid DNA, viral mRNA, and positive-sense anti-genomic RNA, this RT-  
559 PCR procedure can amplify only the negative-sense RNA genome: the reverse transcription  
560 primer is designed to anneal to the leader sequence of the negative-strand genome so that cDNA

561 synthesis can start from the negative-sense RNA genome, with no other possible templates.  
562 Additionally, the PCR amplifies the cDNA, not any plasmids which were transfected into producer  
563 cell lines during viral vector production, because the forward PCR primer anneals to the primer  
564 used in the reverse transcription, rather than any viral sequence. This RT-PCR protocol ensures  
565 that only negative-sense RNA rabies viral genomes can be sequenced.  
566

### 567 **Sanger sequencing of transgenes in SiR viruses**

568 The procedure for sequencing the transgene inserts was the same as above, but with the RT  
569 primer being Adaptor\_N8\_M\_fp (see below), annealing to the M gene and again with a random  
570 8-nucleotide index to tag each clone, and with PCR primers pEX\_adaptor\_fp (see above) and  
571 Barcode2\_L\_rp (see below), to amplify the sequences from the 3' end of the M gene to the 5' end  
572 of the L gene, covering the iCre-P2A-mCherryPEST (or FLPo-P2A-mCherryPEST) sequence.  
573

574 Primers for RT and PCR for Sanger sequencing were as follows:

575 Adaptor\_N8\_M\_fp:

576 TCAGACGATGCGTCATGCNNNNNNNNCAACTCCAACCCTTGGGAGCA

577 Barcode2\_L\_rp:

578 GCAGAGTCATGTATAGTTGGGGACAATGGGGGTTCC

579

### 580 **Sanger sequencing analysis**

581 Alignment and mutation detection were performed using SnapGene 4.1.9 (GSL Biotech LLC,  
582 USA). Reference sequences of the viral samples used in this study were based on deposited  
583 plasmids in Addgene: pSAD-F3-NPEST-iCRE-2A-mCherryPEST (Addgene #99608), pSAD-F3-  
584 NPEST-FLPo-2A-mCherryPEST (Addgene #99609), and pRVΔG-4mCherry (Addgene #52488).  
585 Traces corresponding to indices and mutations listed in Figure 3 and Supplementary File S2 were  
586 also manually inspected and confirmed.  
587

### 588 **Single-molecule, real-time (SMRT) sequencing**

589 Double-stranded DNA samples for SMRT sequencing were prepared similarly to the above,  
590 except that that the clones generated from each of the three virus samples were tagged with one  
591 of the standard PacBio barcode sequences to allow identification of each clone's sample of origin  
592 following multiplex sequencing (see <https://www.pacb.com/wp-content/uploads/multiplex-target-enrichment-barcoded-multi-kilobase-fragments-probe-based-capture-technologies.pdf> and  
593 <https://github.com/PacificBiosciences/Bioinformatics-Training/wiki/Barcoding-with-SMRT-Analysis-2.3>). This was in addition to the random index (10 nucleotides in this case) that was  
594 again included in the RT primers in order to uniquely tag each individual genome.  
595

596

597 RNA viral genomes were extracted from two Tripodi lab (SiR-CRE and Sir-FLPo) and one  
598 Wickersham lab (RVΔG-4Cre(Chatterjee et al., 2018); see Addgene #98034 for reference  
599 sequence) virus samples using a Nucleospin RNA kit (Macherey-Nagel, Germany) and treated  
600 with DNase I (37°C for 1 hour, followed by 70° for 5 minutes). Primers for RT and PCR are listed  
601 below. PCR cycling conditions were as follows: denaturation at 98°C for 30 seconds, followed by  
602 20 cycles of amplification (denaturation at 98°C for 5 seconds and extension at 72°C for 75  
603 seconds), with a final extension at 72°C for 5 minutes. This left each amplicon with a 16bp barcode  
604 at each of its ends that indicated which virus sample it was derived from, in addition to a 10-nt  
605 index sequence that was unique to each genome molecule.  
606

607

608 Primers for RT and PCR for SMRT sequencing were as follows:

609 RVΔG-4Cre:

610 RT:

611 Barcode1\_cagc\_N10\_leader\_fp:

612 TCAGACGATGCGTCATCAGCNNNNNNNNNACGCTTAACAACCAGATC  
613 PCR:  
614 Barcode1\_cagc\_fp: TCAGACGATGCGTCAT-CAGC  
615 Barcode2\_P\_rp (see above)  
616  
617 SiR-CRE:  
618 RT:  
619 Barcode5\_cagc\_N10\_leader\_fp:  
620 ACACGCATGACACACTCAGCNNNNNNNNNACGCTTAACAACCAGATC  
621 PCR:  
622 Barcode5\_cagc\_fp: ACACGCATGACACACT-CAGC  
623 Barcode3\_P\_rp: GAGTGCTACTCTAGTACTTCTTGAGCTCTCGGCCAG  
624  
625 SiR-FLPo:  
626 RT:  
627 Barcode9\_cagc\_N10\_leader\_fp:  
628 CTGCGTGCTCTACGACCAGCNNNNNNNNNACGCTTAACAACCAGATC  
629 PCR:  
630 Barcode9\_cagc\_fp: CTGCGTGCTCTACGAC-CAGC  
631 Barcode4\_P\_rp: CATGTACTGATACACACTTCTTGAGCTCTCGGCCAG  
632

633 After the amplicons were extracted and purified from an agarose gel, the three were mixed  
634 together at 1:1:1 molar ratio. The amplicons' sizes were confirmed on the Fragment Analyzer  
635 (Agilent Technologies, USA), then hairpin loops were ligated to both ends of the mixed amplicons  
636 to make circular SMRTbell templates for Pacbio Sequel sequencing. SMRTbell library preparation  
637 used the PacBio Template Preparation Kit v1.0 and Sequel Chemistry v3. Samples were then  
638 sequenced on a PacBio Sequel system running Sequel System v.6.0 (Pacific Biosciences, USA),  
639 with a 10-hour movie time.

#### 641 **Bioinformatics for PacBio sequence analysis**

642 For the ~2kb template, the DNA polymerase with a strand displacement function can circle around  
643 the template and hairpins multiple times; the consensus sequence of multiple passes yields a  
644 CCS (circular consensus sequence) read for each molecule. Raw sequences were initially  
645 processed using SMRT Link v.6.0 (Pacific Biosciences, USA). Sequences were filtered for a  
646 minimum of read length 10 bp, pass 3, and read score 65. 127,178 CCS reads were filtered  
647 through passes 3 and Q10; 89,188 CCS reads through passes 5 and Q20; 29,924 CCS reads  
648 through passes 8 and Q30. Downstream bioinformatics analysis was performed using BLASR  
649 V5.3.2 for the alignment, bcftools v.1.6 for variant calling. Mutations listed in Figure 4 and  
650 Supplementary File S3 were also manually inspected and confirmed using Integrative Genomics  
651 Viewer 2.3.32 ([software.broadinstitute.org/software/igv/](http://software.broadinstitute.org/software/igv/)). Analysis steps included the following: 1.  
652 Exclude CCS reads under 1000 bases, which may have been derived from non-specific reverse  
653 transcription or PCR reactions. 2. Classify the CCS reads to the three samples, according to the  
654 PacBio barcodes on the 5' ends. 3. For any CCS reads that contain the same 10-nucleotide  
655 random index, select only one of them, to avoid double-counting of clones derived from the same  
656 cDNA molecule. 4. Align the reads to the corresponding reference sequence (see Supplementary  
657 Files S4-S6). 5. Count the number of mutations at each nucleotide position of the reference  
658 sequences.

#### 661 **ACKNOWLEDGEMENTS**

662 We thank Ernesto Ciabatti and Marco Tripodi for sharing samples of EnvA/SiR-CRE and  
663 EnvA/SiR-FLPo and for comments on the manuscript. We thank Sean Whelan and Ayano  
664 Matsushima for helpful discussion and Jun Zhuang, Soumya Chatterjee, and Ali Cetin for helpful  
665 discussion and sharing their own results. We thank Stuart Levine, Noelani Kamelamela, and  
666 Huiming Ding of the MIT BioMicro Center for assistance with SMRT sequencing and bioinformatic  
667 data analysis.

668

669

## 670 REFERENCES

671

672 Atasoy, D., Aponte, Y., Su, H.H., and Sternson, S.M. (2008). A FLEX switch targets  
673 Channelrhodopsin-2 to multiple cell types for imaging and long-range circuit mapping. *The*  
674 *Journal of neuroscience : the official journal of the Society for Neuroscience* 28, 7025-7030.

675

676 Augustine, V., Gokce, S.K., Lee, S., Wang, B., Davidson, T.J., Reimann, F., Gribble, F.,  
677 Deisseroth, K., Lois, C., and Oka, Y. (2018). Hierarchical neural architecture underlying thirst  
678 regulation. *Nature* 555, 204-209.

679

680 Bates, P., Young, J.A., and Varmus, H.E. (1993). A receptor for subgroup A Rous sarcoma virus  
681 is related to the low density lipoprotein receptor. *Cell* 74, 1043-1051.

682

683 Carneiro, M.O., Russ, C., Ross, M.G., Gabriel, S.B., Nusbaum, C., and DePristo, M.A. (2012).  
684 Pacific biosciences sequencing technology for genotyping and variation discovery in human  
685 data. *BMC Genomics* 13, 375.

686

687 Chatterjee, S., Sullivan, H.A., MacLennan, B.J., Xu, R., Hou, Y., Lavin, T.K., Lea, N.E.,  
688 Michalski, J.E., Babcock, K.R., Dietrich, S., *et al.* (2018). Nontoxic, double-deletion-mutant  
689 rabies viral vectors for retrograde targeting of projection neurons. *Nat Neurosci* 21, 638-646.

690

691 Ciabatti, E., Gonzalez-Rueda, A., Mariotti, L., Morgese, F., and Tripodi, M. (2017). Life-Long  
692 Genetic and Functional Access to Neural Circuits Using Self-Inactivating Rabies Virus. *Cell* 170,  
693 382-392 e314.

694

695 Clark, H.F., Parks, N.F., and Wunner, W.H. (1981). Defective interfering particles of fixed rabies  
696 viruses: lack of correlation with attenuation or auto-interference in mice. *J Gen Virol* 52, 245-  
697 258.

698

699 Combe, M., and Sanjuan, R. (2014). Variation in RNA virus mutation rates across host cells.  
700 *PLoS Pathog* 10, e1003855.

701

702 Drobizhev, M., Makarov, N.S., Tillo, S.E., Hughes, T.E., and Rebane, A. (2011). Two-photon  
703 absorption properties of fluorescent proteins. *Nat Methods* 8, 393-399.

704

705 Evans, D.A., Stempel, A.V., Vale, R., Ruehle, S., Lefler, Y., and Branco, T. (2018). A synaptic  
706 threshold mechanism for computing escape decisions. *Nature* 558, 590-594.

707

708 Gomme, E.A., Wirblich, C., Addya, S., Rall, G.F., and Schnell, M.J. (2012). Immune clearance  
709 of attenuated rabies virus results in neuronal survival with altered gene expression. *PLoS*  
710 *Pathog* 8, e1002971.

711

- 712 Holland, J.J., De La Torre, J.C., and Steinhauer, D.A. (1992). RNA virus populations as  
713 quasispecies. *Curr Top Microbiol Immunol* 176, 1-20.  
714
- 715 Holmes, E.C., Woelk, C.H., Kassis, R., and Bourhy, H. (2002). Genetic constraints and the  
716 adaptive evolution of rabies virus in nature. *Virology* 292, 247-257.  
717
- 718 Jenkins, G.M., Rambaut, A., Pybus, O.G., and Holmes, E.C. (2002). Rates of molecular  
719 evolution in RNA viruses: a quantitative phylogenetic analysis. *J Mol Evol* 54, 156-165.  
720
- 721 Kaelberer, M.M., Buchanan, K.L., Klein, M.E., Barth, B.B., Montoya, M.M., Shen, X., and  
722 Bohorquez, D.V. (2018). A gut-brain neural circuit for nutrient sensory transduction. *Science*  
723 361.  
724
- 725 Kawai, A., and Matsumoto, S. (1977). Interfering and noninterfering defective particles  
726 generated by a rabies small plaque variant virus. *Virology* 76, 60-71.  
727
- 728 Kohl, J., Babayan, B.M., Rubinstein, N.D., Autry, A.E., Marin-Rodriguez, B., Kapoor, V.,  
729 Miyamishi, K., Zweifel, L.S., Luo, L., Uchida, N., *et al.* (2018). Functional circuit architecture  
730 underlying parental behaviour. *Nature* 556, 326-331.  
731
- 732 Madisen, L., Mao, T., Koch, H., Zhuo, J.M., Berenyi, A., Fujisawa, S., Hsu, Y.W., Garcia, A.J.,  
733 3rd, Gu, X., Zanella, S., *et al.* (2012). A toolbox of Cre-dependent optogenetic transgenic mice  
734 for light-induced activation and silencing. *Nature neuroscience* 15, 793-802.  
735
- 736 Madisen, L., Zwingman, T.A., Sunkin, S.M., Oh, S.W., Zariwala, H.A., Gu, H., Ng, L.L., Palmiter,  
737 R.D., Hawrylycz, M.J., Jones, A.R., *et al.* (2010). A robust and high-throughput Cre reporting  
738 and characterization system for the whole mouse brain. *Nature neuroscience* 13, 133-140.  
739
- 740 Marr, R.A., Guan, H., Rockenstein, E., Kindy, M., Gage, F.H., Verma, I., Masliah, E., and Hersh,  
741 L.B. (2004). Neprilysin regulates amyloid Beta peptide levels. *J Mol Neurosci* 22, 5-11.  
742
- 743 Matsuda, T., and Cepko, C.L. (2004). Electroporation and RNA interference in the rodent retina  
744 in vivo and in vitro. *P Natl Acad Sci USA* 101, 16-22.  
745
- 746 Morimoto, K., Hooper, D.C., Spitsin, S., Koprowski, H., and Dietzschold, B. (1999).  
747 Pathogenicity of different rabies virus variants inversely correlates with apoptosis and rabies  
748 virus glycoprotein expression in infected primary neuron cultures. *J Virol* 73, 510-518.  
749
- 750 Niwa, H., Yamamura, K., and Miyazaki, J. (1991). Efficient selection for high-expression  
751 transfectants with a novel eukaryotic vector. *Gene* 108, 193-199.  
752
- 753 Osakada, F., and Callaway, E.M. (2013). Design and generation of recombinant rabies virus  
754 vectors. *Nat Protoc* 8, 1583-1601.  
755
- 756 Prehaud, C., Lay, S., Dietzschold, B., and Lafon, M. (2003). Glycoprotein of nonpathogenic  
757 rabies viruses is a key determinant of human cell apoptosis. *J Virol* 77, 10537-10547.  
758
- 759 Raymond, C.S., and Soriano, P. (2007). High-efficiency FLP and PhiC31 site-specific  
760 recombination in mammalian cells. *PLoS One* 2, e162.  
761

- 762 Reardon, T.R., Murray, A.J., Turi, G.F., Wirblich, C., Croce, K.R., Schnell, M.J., Jessell, T.M.,  
763 and Losonczy, A. (2016). Rabies Virus CVS-N2c(DeltaG) Strain Enhances Retrograde Synaptic  
764 Transfer and Neuronal Viability. *Neuron* 89, 711-724.  
765
- 766 Shaner, N.C., Campbell, R.E., Steinbach, P.A., Giepmans, B.N., Palmer, A.E., and Tsien, R.Y.  
767 (2004). Improved monomeric red, orange and yellow fluorescent proteins derived from  
768 *Discosoma* sp. red fluorescent protein. *Nat Biotechnol* 22, 1567-1572.  
769
- 770 Steinhauer, D.A., de la Torre, J.C., and Holland, J.J. (1989). High nucleotide substitution error  
771 frequencies in clonal pools of vesicular stomatitis virus. *J Virol* 63, 2063-2071.  
772
- 773 Steinhauer, D.A., and Holland, J.J. (1987). Rapid evolution of RNA viruses. *Annu Rev Microbiol*  
774 41, 409-433.  
775
- 776 Subach, O.M., Cranfill, P.J., Davidson, M.W., and Verkhusha, V.V. (2011). An enhanced  
777 monomeric blue fluorescent protein with the high chemical stability of the chromophore. *PLoS*  
778 *One* 6, e28674.  
779
- 780 Sullivan, H.A., and Wickersham, I.R. (2015). Concentration and purification of rabies viral and  
781 lentiviral vectors. *Cold Spring Harb Protoc* 2015, 386-391.  
782
- 783 Tao, L., Ge, J., Wang, X., Zhai, H., Hua, T., Zhao, B., Kong, D., Yang, C., Chen, H., and Bu, Z.  
784 (2010). Molecular basis of neurovirulence of flury rabies virus vaccine strains: importance of the  
785 polymerase and the glycoprotein R333Q mutation. *J Virol* 84, 8926-8936.  
786
- 787 Turan, S., Kuehle, J., Schambach, A., Baum, C., and Bode, J. (2010). Multiplexing RMCE:  
788 versatile extensions of the Flp-recombinase-mediated cassette-exchange technology. *J Mol Biol*  
789 402, 52-69.  
790
- 791 Weible, A.P., Schwarcz, L., Wickersham, I.R., Deblander, L., Wu, H., Callaway, E.M., Seung,  
792 H.S., and Kentros, C.G. (2010). Transgenic targeting of recombinant rabies virus reveals  
793 monosynaptic connectivity of specific neurons. *The Journal of neuroscience : the official journal*  
794 *of the Society for Neuroscience* 30, 16509-16513.  
795
- 796 Wickersham, I.R., Finke, S., Conzelmann, K.K., and Callaway, E.M. (2007a). Retrograde  
797 neuronal tracing with a deletion-mutant rabies virus. *Nature Methods* 4, 47-49.  
798
- 799 Wickersham, I.R., Lyon, D.C., Barnard, R.J., Mori, T., Finke, S., Conzelmann, K.K., Young, J.A.,  
800 and Callaway, E.M. (2007b). Monosynaptic restriction of transsynaptic tracing from single,  
801 genetically targeted neurons. *Neuron* 53, 639-647.  
802
- 803 Wickersham, I.R., and Sullivan, H.A. (2015). Rabies viral vectors for monosynaptic tracing and  
804 targeted transgene expression in neurons. *Cold Spring Harb Protoc* 2015, 375-385.  
805
- 806 Wickersham, I.R., Sullivan, H.A., Pao, G.M., Hamanaka, H., Goosens, K.A., Verma, I.M., and  
807 Seung, H.S. (2015). Lentiviral vectors for retrograde delivery of recombinases and  
808 transactivators. *Cold Spring Harb Protoc* 2015, 368-374.  
809
- 810 Wickersham, I.R., Sullivan, H.A., and Seung, H.S. (2010). Production of glycoprotein-deleted  
811 rabies viruses for monosynaptic tracing and high-level gene expression in neurons. *Nature*  
812 *protocols* 5, 595-606.



813

814 Wiktor, T.J., Dietzschold, B., Leamson, R.N., and Koprowski, H. (1977). Induction and  
815 biological properties of defective interfering particles of rabies virus. *J Virol* 21, 626-635.

816

817 Wirblich, C., and Schnell, M.J. (2011). Rabies virus (RV) glycoprotein expression levels are not  
818 critical for pathogenicity of RV. *J Virol* 85, 697-704.

819

## FIGURE LEGENDS

Legends here are for the main figures only. Legends for Supplementary Information are after the main figure images below.

### Figure 1: SiR viruses appear to cause expression of viral nucleoprotein at levels similar to those of first-generation $\Delta$ G viruses.

(A-D) Reporter cells infected with first-generation,  $\Delta$ G viruses show characteristic bright, clumpy anti-nucleoprotein staining (green), indicating high nucleoprotein expression and active viral replication. Red is mCherry expression, reporting expression of Cre or FLPO; blue is mTagBFP2, constitutively expressed by these reporter cell lines.

(E-H) Reporter cells infected with second-generation,  $\Delta$ GL viruses show only punctate staining for nucleoprotein, indicating isolated individual viral particles or ribonucleoprotein complexes; these viruses do not replicate intracellularly (Chatterjee et al., 2018). Reporter cassette activation takes longer from the lower recombinase expression levels of these viruses, so mCherry expression is dimmer than in cells infected with  $\Delta$ G viruses at the same time point.

(I-J) Reporter cells infected with SiR viruses show clumps of nucleoprotein and rapid reporter expression indicating high expression of recombinases, similarly to cells infected with  $\Delta$ G viruses. Scale bar: 100  $\mu$ m, applies to all panels.

### Figure 2: Longitudinal two-photon imaging *in vivo* shows that SiR virus kills approximately 80% of infected neurons *in vivo* within 2-4 weeks.

A) Representative fields of view (FOVs) of visual cortical neurons labeled with RV $\Delta$ G-4Cre (top row), RV $\Delta$ GL-4Cre (middle row), or SiR-CRE (bottom row) in Ai14 mice (Cre-dependent expression of tdTomato). Images within each row are of the same FOV imaged at the four different time points in the same mouse. Circles indicate cells that are present at 7 days postinjection but no longer visible at a subsequent time point. Scale bar: 50  $\mu$ m, applies to all images.

B-D) Numbers of cells present at week 1 that were still present in subsequent weeks. While very few cells labeled with RV $\Delta$ GL-4Cre were lost, and RV $\Delta$ G-4Cre killed a significant minority of cells, SiR-CRE killed the majority of labeled neurons within 14 days following injection.

E) Percentages of cells present at week 1 that were still present in subsequent imaging sessions. By 28 days postinjection, an average of only 20.5% of cells labeled by SiR-CRE remained.

### Figure 3: Single-molecule Sanger sequencing of barcoded viral genomes reveals that most SiR virions have lost the intended C-terminal modification to the nucleoprotein.

(A) Schematic of the RT-PCR workflow. In the reverse transcription (RT) step, the RT primer, containing a random 8-nucleotide sequence, anneals to the 3' rabies virus leader, adding a unique random index to the 5' end of the cDNA molecule corresponding to each individual viral particle's RNA genome. In the PCR step, the forward PCR primer anneals to the RT primer sequence and the reverse PCR primer anneals within the viral phosphoprotein gene P. Both PCR primers have 15-base sequences homologous to those flanking an insertion site in a plasmid used for sequencing, allowing the amplicons to be cloned into the plasmid using a seamless cloning method before transformation into bacteria. The resulting plasmid library consists of plasmids containing up to 4<sup>8</sup> different index sequences, allowing confirmation that the sequences of plasmids purified from individual picked colonies correspond to the sequences of different individual rabies viral particles' genomes.

(B) Representative Sanger sequencing data of the 8-bp index and the TEV-PEST sequence. Mutations are highlighted in red.

(C) Mutation variants and their frequencies in each viral vector sample based on Sanger sequencing data. No unmutated genomes were found in the SiR-CRE sample: 50 out of 51 had a substitution creating an opal stop codon just before the TEV cleavage site, and the 51<sup>st</sup> genome contained a frameshift which also removed the C-terminal addition. In the SiR-FLPO sample, only 4 out of 50 clones had an intact sequence of the C-terminal addition; the other 46 out of 50 had one of two *de novo* stop codons at the end of N or the beginning of the TEV cleavage site. In the sample of RV $\Delta$ G-4mCherry, a virus from our laboratory included as a control to distinguish true mutations on the rabies genomes from mutations due to the RT-PCR process, none of the 51 clones analyzed had mutations in the sequenced region.

### Figure 4: Single-molecule, real-time (SMRT) sequencing of thousands of barcoded viral genomes confirms that most SiR virions have lost the intended C-terminal modification to the nucleoprotein.

(A) Schematic of workflow for SMRT sequencing. An RT primer with a random 10-nucleotide sequence anneals to the leader sequence on the negative-sense single-stranded RNA genome. Forward and reverse PCR primers have distinct SMRT barcodes at their 5' ends for the three different virus samples. After RT-PCR, each amplicon library consists of amplicons each containing a SMRT barcode to identify the sample of origin as well as the 10-nucleotide index (i.e., with a potential diversity of  $4^{10}$  different indices) to uniquely label the individual genome of origin. SMRT "dumbbell" adaptors are then ligated to the amplicons' ends, making circular templates which are then repeatedly traversed by a DNA polymerase, resulting in long polymerase reads each containing multiple reads of the positive and negative strands. The individual subreads for a given molecule are combined to form circular consensus sequence (CCS) reads.

(B) High-frequency (>2%) point mutations found in the rabies vector samples based on SMRT sequencing. Horizontal axis represents nucleotide position along the reference sequences (see text); vertical axis represents variant frequency. Total number of CCS3 reads (i.e., with at least 3 subreads for each position) are 22,205 for SiR-CRE, 17,086 reads for SiR-FLPo, and 17,978 reads for RV $\Delta$ G-4Cre. The great majority of SiR-CRE and SiR-FLPo genomes have point mutations creating premature stop codons at or just after the end of N and before the C-terminal addition. The only frequent (>2%) mutation found in the control virus, RV $\Delta$ G-4Cre, was a single amino acid substitution at position 419 in 9.49% of virions. Insertions and deletions are not shown here (see text).

(C) Summary of results. In the SiR virus samples, 99.22% of SiR-Cre virions and 83.85% of SiR-FLPo virions had point mutations creating premature stop codons that completely removed the intended C-terminal addition to the nucleoprotein, making them simply first-generation ( $\Delta$ G) rabies viral vectors. This does not include any insertions or deletions causing frameshifts (see text), which would further increase the percentage of first-generation-type virions in these samples. In the RV $\Delta$ G-4Cre sample, there were no premature stop codons at or near the end of the nucleoprotein gene.

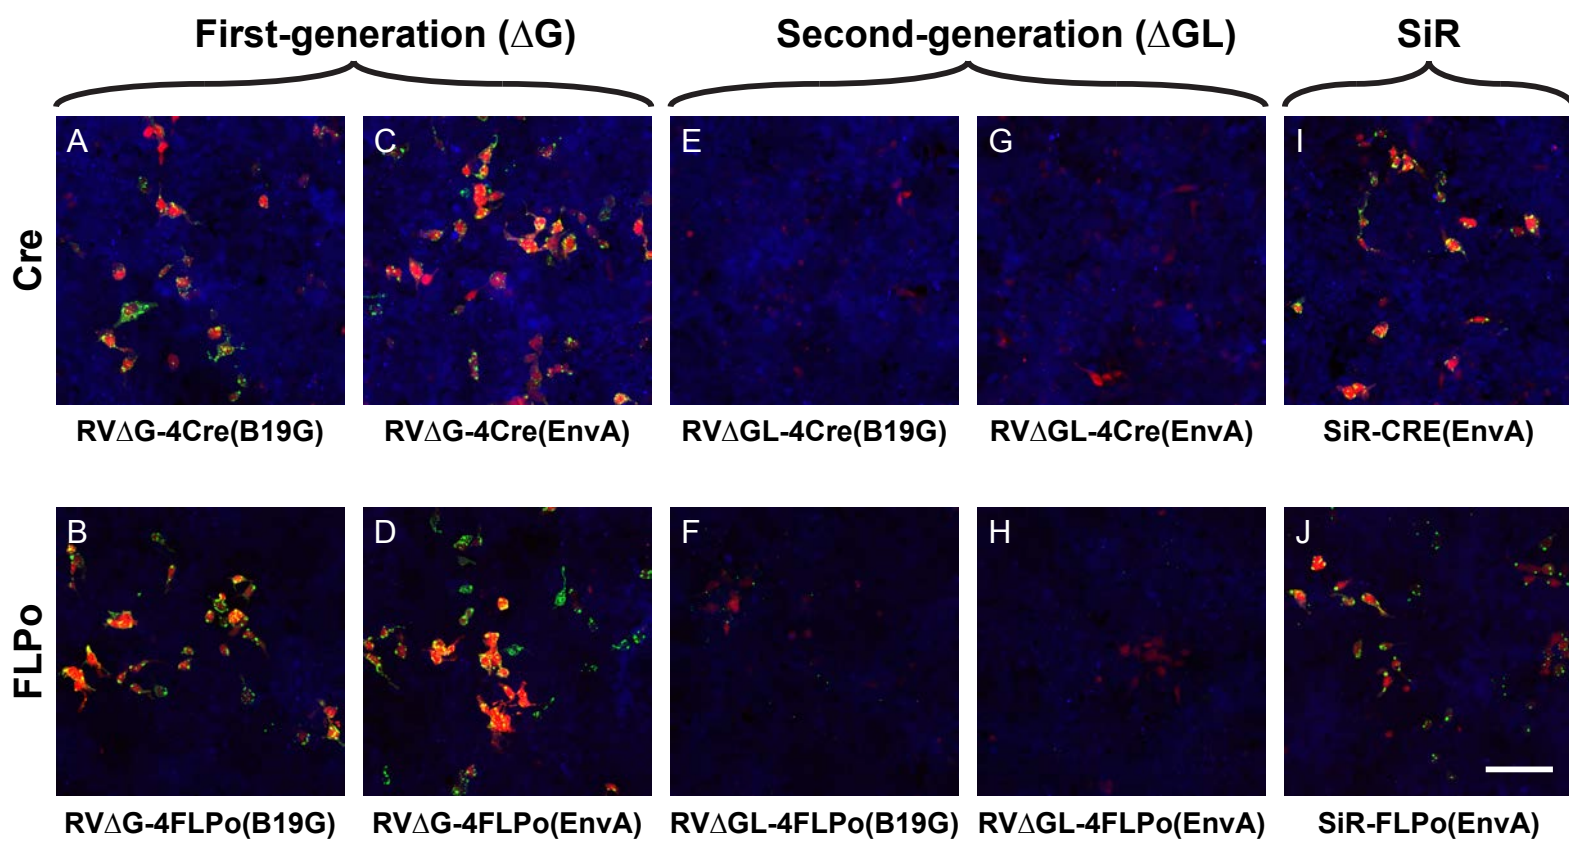

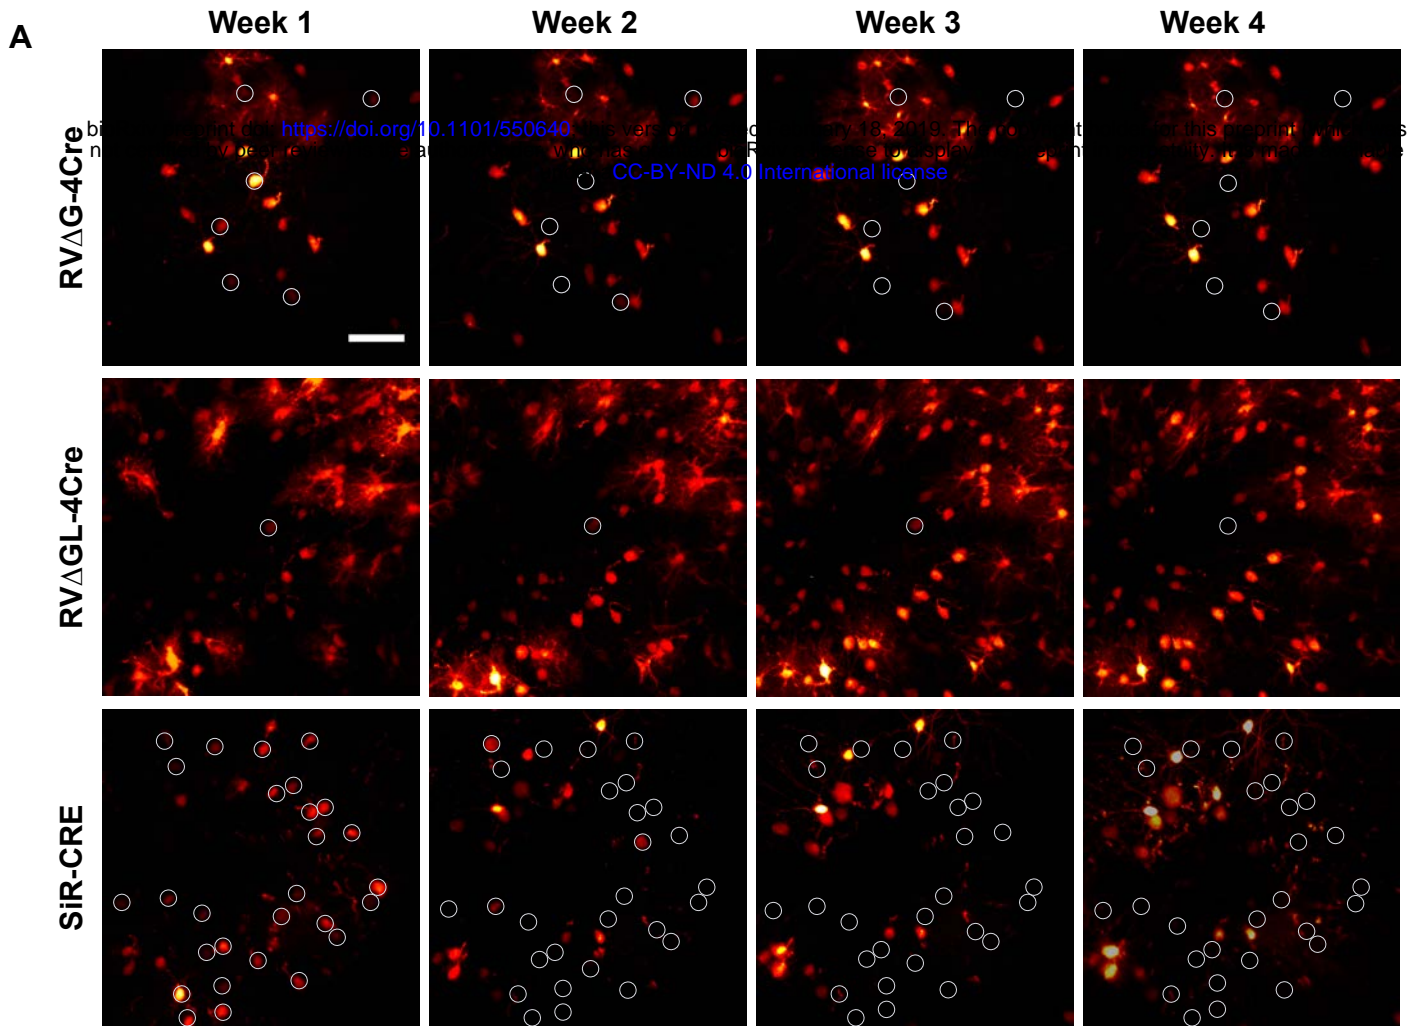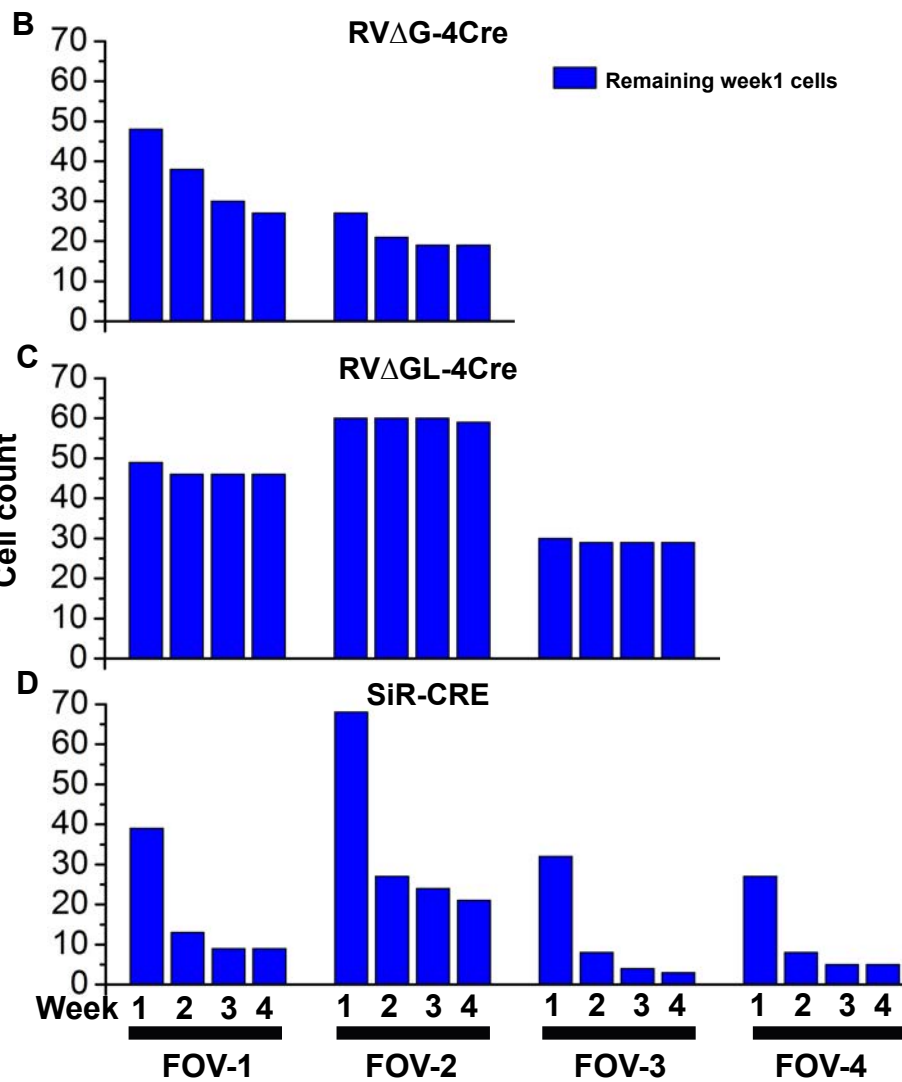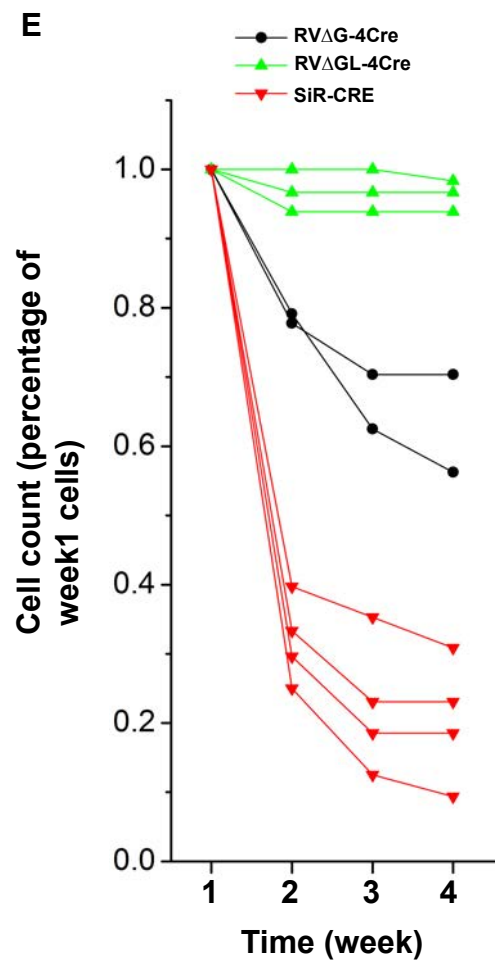

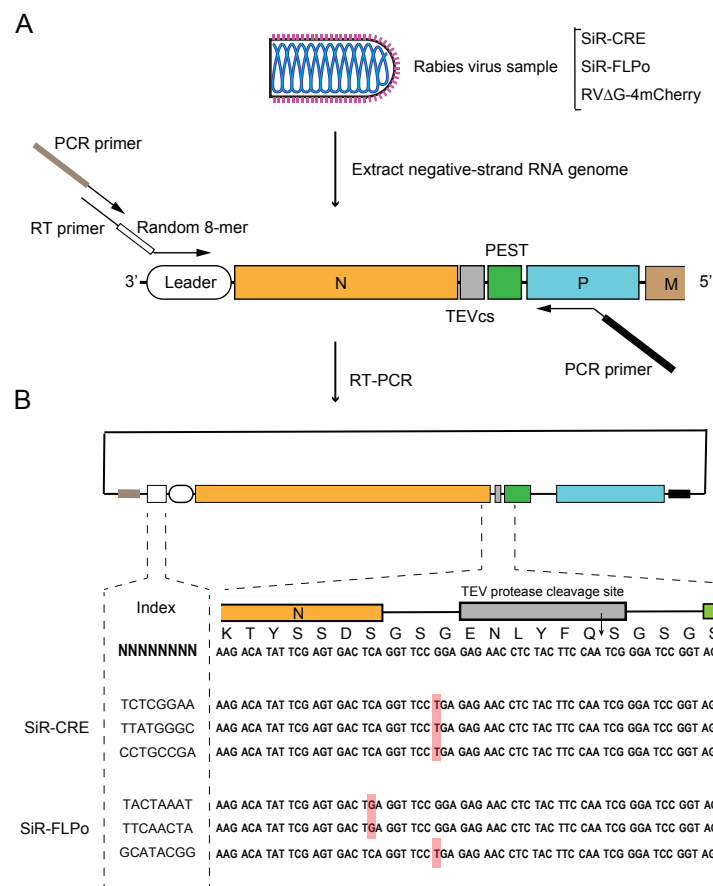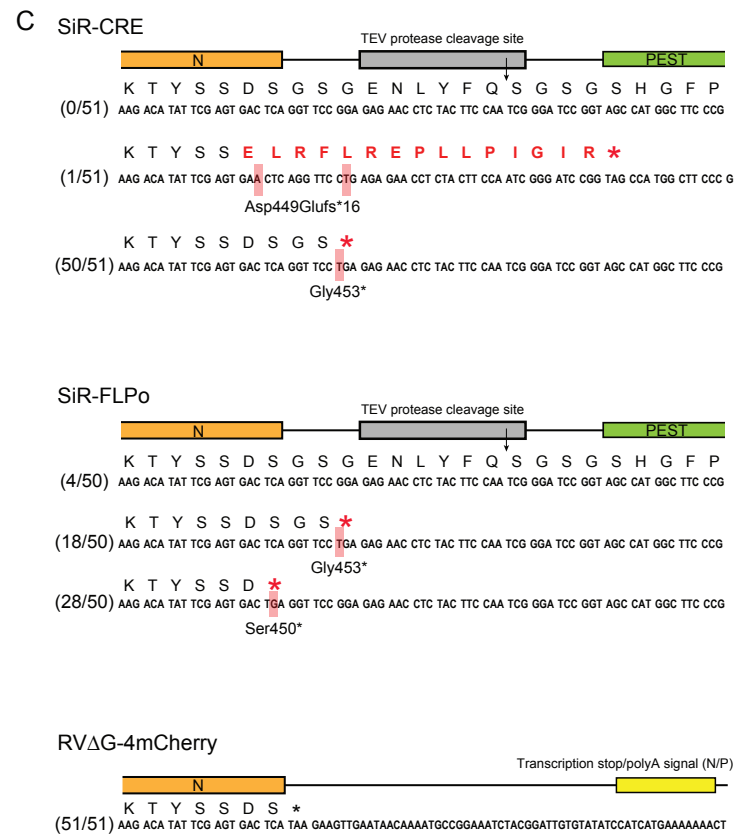

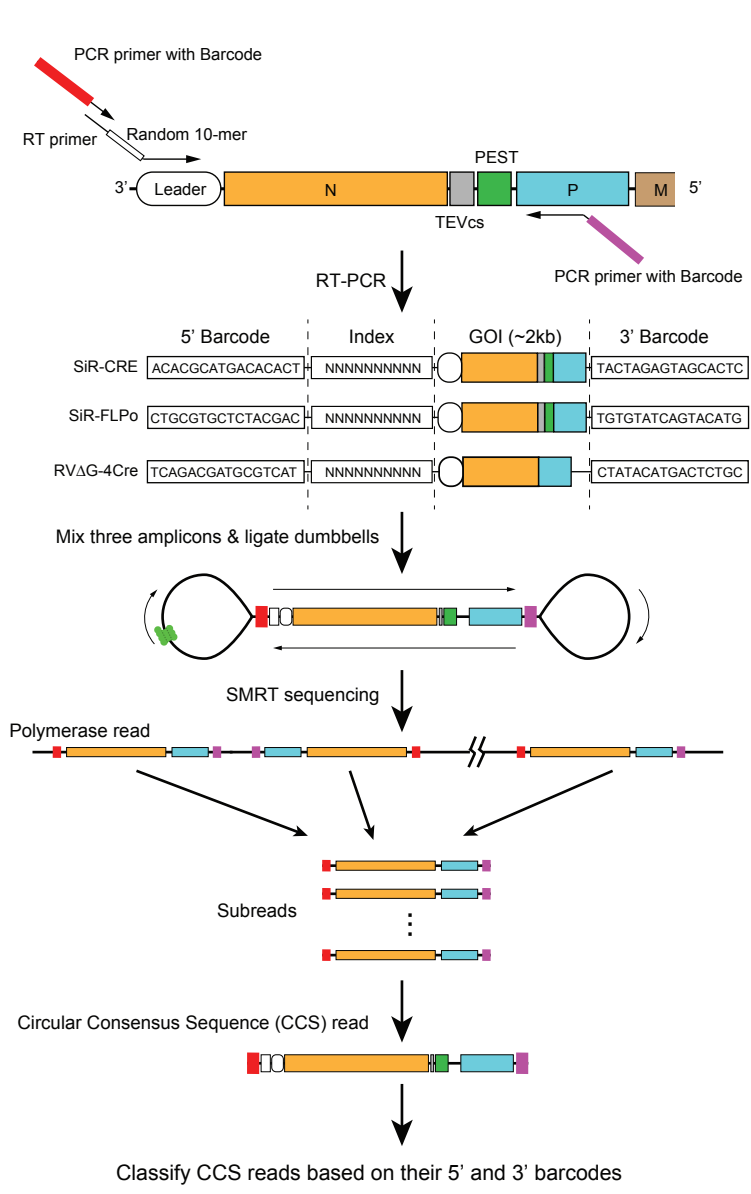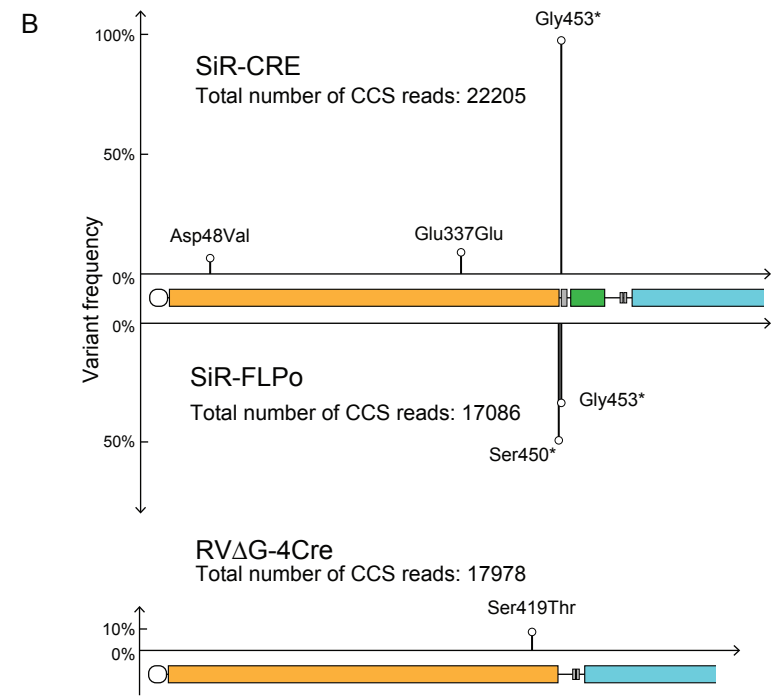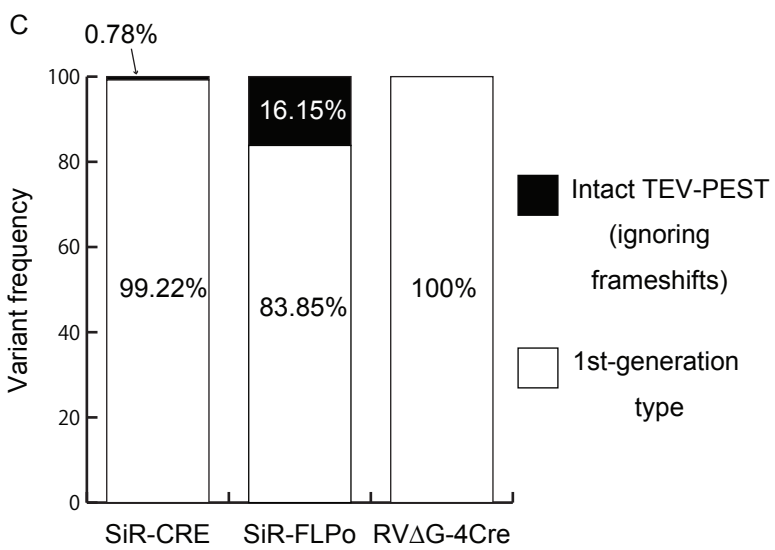

## LEGENDS FOR SUPPLEMENTARY INFORMATION

### **Supplementary File S1: >90% of SiR-CRE viral particles with the mCherry gene intact also have the Cre gene intact, suggesting that most of the SiR-CRE-infected cells that disappear over time in tdTomato reporter mice are dying rather than simply stopping expression of mCherry.**

We sequenced the transgene inserts for 21 individual SiR-CRE clones (see Methods). 19 out of 21 had no mutations in the Cre gene, and two had one point mutation each (Ala88Val and Arg189Ile). All 21 had an intact mCherry gene. The lack of a large proportion of Cre-knockout mutants is one indication that the majority of red fluorescent neurons in SiR-CRE-injected Ai14 (tdTomato reporter) mice are not labeled only with mCherry, providing evidence that their disappearance is equivalent to their death. Parenthetically, we also partially sequenced the transgene insert for four individual clones of the SiR-FLPo sample, just to confirm the identity of the virus. In one of the four sequenced virions, we found a 15 bp deletion in the FLPo gene as well as a synonymous Thr → Thr (ACC → ACA) substitution at position 47 of the mCherry gene; in another, we found a Gly → Ser mutation at position 4 of the mCherry gene. We did not find mutations in the transgenes of other two SiR-FLPo genomes sequenced (data not shown).

### **Supplementary Figure S1: mCherry fluorescence from SiR-CRE is much dimmer than tdTomato fluorescence in Ai14 mice, suggesting that the disappearance of the brighter cells in SiR-CRE-injected Ai14 mice indicates their death.**

A) Representative images of red fluorescence in SiR-CRE-labeled cells in Ai14 (Cre-dependent expression of tdTomato, top row) and Ai35 (Cre-dependent expression of Arch-EGFP-ER2, bottom row). The three images for each mouse line are from 3 different mice of each line, imaged 7 days following SiR-CRE injection (see Methods), all with the same laser intensity and wavelength (1020 nm). Red fluorescence due only to mCherry (i.e., in Ai35 mice) is obviously much dimmer than that due to tdTomato (i.e., in Ai14 mice). Scale bar: 50 μm, applies to all images.

B) Intensity of red fluorescence of SiR-CRE-labeled cells in Ai14 (left) and Ai35 (right) mice. Data point indicate intensity of individual cells in arbitrary units at the same laser and microscope settings (see Methods). Box plots indicate median, 25th–75th percentiles (boxes), and full range (whiskers) of intensities for each mouse. The average of the mean red fluorescent intensity in each mouse was 48.97 in Ai14 and 15.69 in Ai35 ( $p=0.00283 < 0.01$ , one-way ANOVA); the midpoint of these means, 32.33, was used as the cutoff for the reanalysis of the data in Ai14 mice to exclude neurons that could have been labeled with mCherry alone.

### **Supplementary Video S1: Video of 95% of SiR-CRE-labeled neurons in an Arch-EGFP-ER2 reporter mouse disappearing between 11 days and 28 days postinjection.**

Two-photon image stacks of a single FOV of visual cortical neurons in an Ai35 mouse imaged at four different time points; time in the video represents depth of focus. Large blobs are glia. 18 out of the 19 neurons visibly labeled with Arch-EGFP-ER2 at 11 days following injection of SiR-Cre are no longer visible 17 days later. White circles indicate cells present at both 11 days and all subsequent imaging sessions; red circles indicate cells present at 11 days but gone by 28 days.

### **Supplementary Figure S2: 86% of SiR-CRE-labeled neurons in Arch-EGFP-ER2 reporter mice disappear between 11 days and 28 days after injection.**

A) Maximum intensity projections of the two-photon FOV shown in Supplementary Video S1 of visual cortical neurons labeled with SiR-CRE in an Ai35 mouse, 11-28 days postinjection. Images are from the same FOV at four different time points. All cells clearly visible on day 11 are circled. In this example, 18 out of 19 cells (red circles) disappeared by a subsequent imaging session. Only one cell (white circle) is still visible on day 28. Numbers below four of the circles mark the cells for which intensity profiles are shown in panel B. Scale bar: 50 μm, applies to all images.

B) Green fluorescence intensity versus depth for the four representative neurons numbered in panel A at the four different time points, showing disappearance of three of them over time.

C) Fraction of cells visibly EGFP-labeled at day 11 still visible at later time points, from four different FOVs in two Ai35 mice. Connected sets of markers indicate cells from the same FOV. 86% of SiR-CRE-labeled neurons had disappeared by 4 weeks postinjection.

### **Supplementary Figure S3: 81% of SiR-CRE-labeled neurons in tdTomato reporter mice disappear within 2-4 weeks, even excluding dimmer cells that might have only been labeled with mCherry.**



A) Same representative fields of view as in Figure 2 but with circles now marking only cells with intensity at 7 days of greater than 32.33 a.u. (see text and Supplementary Figure S1) that are no longer visible at a subsequent time point. Scale bar: 50  $\mu$ m, applies to all images.

B-D) Numbers of cells above threshold fluorescence intensity at week 1 that were still present in subsequent weeks. The conclusions from Figure 2 are unchanged: few cells labeled with RV $\Delta$ GL-4Cre were lost, RV $\Delta$ G-4Cre killed a significant minority of cells, and SiR-CRE killed the majority of labeled neurons within two weeks following injection.

E) Percentages of cells above threshold at week 1 that were still present in subsequent imaging sessions. By 28 days postinjection, an average of only 19.2% of suprathreshold SiR-CRE-labeled cells remained.

**Supplementary File S2: Sanger sequencing data of all clones shown in Figure 3.**

51 clones derived from SiR-CRE, 50 from SiR-FLPo, and 51 from RV $\Delta$ G-4mCherry are identified by their unique indices. All of the indices as well as the sequences corresponding to the 3' end of the nucleoprotein gene are shown.

**Supplementary File S3: Summary tables of SMRT sequencing data.** These tables show all mutations occurring at positions mutated at greater than 2% frequency in the three virus samples analyzed. Position numbers in these tables refer to the sequences in the three Genbank files below (Supplementary Files S4-S5).

**Supplementary File S4: SiR-CRE amplicon reference sequence.** This Genbank-format file contains the expected (i.e., based on the published sequence: Addgene #99608) sequence of amplicons obtained from SiR-CRE for SMRT sequencing.

**Supplementary File S5: SiR-FLPo amplicon reference sequence.** This Genbank-format file contains the expected (i.e., based on the published sequence: Addgene # 99609) sequence of amplicons obtained from SiR-FLPo for SMRT sequencing.

**Supplementary File S6: RV $\Delta$ G-4Cre amplicon reference sequence.** This Genbank-format file contains the expected (i.e., based on the published sequence: see Addgene #98034) sequence of amplicons obtained from RV $\Delta$ G-4Cre for SMRT sequencing.

**Supplementary Figure S4: First-generation vector RV $\Delta$ G-4FLPo appears to be toxic to most cells, unlike the comparable first-generation vector RV $\Delta$ G-Cre.** Although we did not rigorously quantify the effect, our FLPo-encoding RV $\Delta$ G-4FLPo appears to kill neurons more quickly than does RV $\Delta$ G-4Cre (cf. Figure 2 and Chatterjee et al.(Chatterjee et al., 2018)). In this example field of view, most neurons clearly visible at earlier time points have disappeared by 28 days postinjection, leaving degenerating cellular debris. See Discussion for possible reasons why a preparation of a first-generation vector encoding a recombinase may or may not preserve a large percentage of infected neurons. Scale bar: 50  $\mu$ m, applies to all panels.

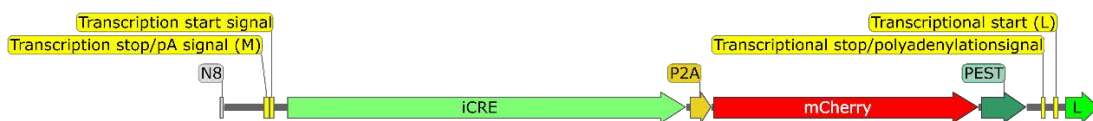

|                                                                                                                      |
|----------------------------------------------------------------------------------------------------------------------|
| Random 8-nucleotide index                                                                                            |
| Cre gene, P2A, mCherry gene, PEST, and transcription stop/polyA signal, transcription start signal, L gene, mutation |

No mutations in transgene insert of SiR-CRE (19/21 clones)

ACTTTCTA, AGCCCAAGT, TTATCAGG, AGGGCGTT, AGTGGGCA, GGGCCTTT, TCCCGCAA, GGTCGGGG, GGCCTATA, TGTCTCTC, CCTGTCCG, TAGCACAC, GATGTGG, TAAGCCT, CTCACAT, TTAGTCC, AACCCGAC, AGCGGCC, AGCGGGGG

CAACTCCAACCCCTGGGAGCAATATAACAAAAACATGTTATGGTGCCATTAAACCGCTGCATTTTCATCAAAGTCA AGTTGATTACCTTTACATTTTGATCCTCTTGGATGTGAAAAAACTATTAAACATCCCTCAAAGGACCTGCAGGTACG CGGCCGCGGTACCGCCACCATGGTGCCCAAGAAGAAGAGGAAAAGTCTCCAACCTGCTGACTGTGCACCAAAAC CTGCCTGCCCTCCCTGTGGATGCCACCTCTGATGAAGTCAGGAAGAACCTGATGGACATGTTTCAGGGACAGGCCA GGCCTTCTCTGAACACACCTGGAAGATGCTCCTGTCTGTGTGCAGATCCTGGGCTGCCTGGTGCAAGCTGAACA ACAGGAAATGGTTCCCTGCTGAACCTGAGGATGTGAGGGACTACCTCCTGTACCTGCAAGCAGAGGCCTGGC TGTGAAGACCATCCAACAGCACCTGGGCCAGCTCAACATGCTGCACAGGAGATCTGGCCTGCCTCGCCCTTCT GACTCCAATGCTGTGTCCCTGGTGATGAGGAGAATCAGAAAGGAGAATGTGGATGCTGGGGAGAGAGCCAAAGC AGGCCCTGGCCTTGAACGCACTGACTTTGACCAAGTCAGATCCCTGATGGAGAAGCTGACAGATGCCAAGGAC ATCAGGAACCTGGCCTTCCCTGGGCATTGCTTACAACACCTGCTGCGCATTGCCGAAATGCCAGAATCAGAGT GAAGGACATCTCCGCACCGATGGTGGGAGAATGCTGATCCACATTGGCAGGACCAAGACCCTGGTGTCCACA CTGGTGTGGAGAAGGCCCTGTCCCTGGGGGTACCAAGCTGGTGGAGAGATGGATCTCTGTGTCTGGTGTGG TGATGACCTGAGGCAACTACCTGTTCTGCCGGGTGAGGATGAGGATGGGACGGCAGTGGAGGATCCGGAGCCACG AACTCTGACCTGAGGCACTGGTGGGCTGCTGAGGATGGGACGGCAGTGGAGGATCCGGAGCCACGAACT TCTCTCTGTTAAAGCAAGCAGGAGACGTGGAAGAAAACCCCGGTCCTACCGGTGTGAGCAAGGGCGAGGAGGA TAACATGGCCATCATCAAGGAGTTCATGCGCTTCAAGGTGCACATGGAGGGCTCCGTGAACGGCCACGAGTTCG AGATCAGGGGCGAGGGCGAGGGCCGCCCTACGAGGGCACCCAGACCAGCCAAAGCTGAAGGTGACCAAGGGT GGCCCTGCCCCTTCCCTGCTGGACATCTGTCCCTCAGTTCATGTACGGCTCCAAGGCCTACGTGAAGCACC CCGCCGACATCCCCGACTACTTGAAGCTGTCTTCCCCGAGGGCTTCAAGTGGGAGCGCGTGTGAACCTCGA GGACGGCGCGGTGGTGACCGTGACCCAGGACTCCTCCCTGCAGGACGGCGAGTTCATCTACAAGGTGAAGCT GCGCGGCACCAACTTCCCTCCGACGGCCCCGTAATGCAGAAGAAGACCATGGGCTGGGAGGCCTCCTCCGA GCGGATGTACCCTGAGGACGGCGCCCTGAAGGGCGAGATCAAGCAGAGGCTGAAGCTGAAGGACGGCGGCCA CTACGACGCTGAGGTCAAGACCACCTACAAGGCCAAGAAGCCCGTGCAGCTGCCGGCGCCTACAACGTCAAC ATCAAGTTGGACATCACCTCCACAACGAGGACTACACCATCGTGAACAGTACGAACCGCGCCGAGGGCCGCC ACTCCACCGGGCGCATGGACGAGCTGTACAAGGATATCTCAGCCATGGCTTCCCGCCGAGGTTGGAGGAGCA GGATGATGGCACGCTGCCCATGCTTGTGCCAGGAGAGCGGGATGGACCGTCAACCTGCAGCCTGTGCTTCT GCTAGGATCAATGTGTGACTCGAGGGCGCGCTACCCGCGGTAGCTTTTCAAGTCAAGAAAAAATTAGATCA GAAGAACAACCTGGCAACACTTCAACCTGAGACTTACTTCAAGATGCTCGATCCTGGAGAGGTCTATGATGACC CTATTGACCCAATCGAGTTAGAGGCTGAACCCAGAGGAACCCCATTTGCCCAAC

Ala88Val mutation in iCre gene of SiR-CRE (1/21 clones)

AGCTGGTT

CAACTCCAACCCCTGGGAGCAATATAACAAAAACATGTTATGGTGCCATTAAACCGCTGCATTTTCATCAAAGTCA AGTTGATTACCTTTACATTTTGATCCTCTTGGATGTGAAAAAACTATTAAACATCCCTCAAAGGACCTGCAGGTACG CGGCCGCGGTACCGCCACCATGGTGCCCAAGAAGAAGAGGAAAAGTCTCCAACCTGCTGACTGTGCACCAAAAC CTGCCTGCCCTCCCTGTGGATGCCACCTCTGATGAAGTCAGGAAGAACCTGATGGACATGTTTCAGGGACAGGCCA GGCCTTCTCTGAACACACCTGGAAGATGCTCCTGTCTGTGTGCAGATCCTGGGCTGCCTGGTGCAAGCTGAACA ACAGGAAATGGTTCCCTGCTGAACCTGAGGATGTGAGGGACTACCTCCTGTACCTGCAAGTCAGAGCCCTGGCT TGATGACCCATCCAACAGCACCTGGGCCAGCTCAACATGCTGCACAGGAGATCTGGCCTGCCTCGCCCTTCTG ACTCCAATGCTGTGTCCCTGGTGATGAGGAGAATCAGAAAGGAGAATGTGGATGCTGGGGAGAGAGCCAAGCA GGCCTGGCCTTGAACGCACTGACTTTGACCAAGTCAGATCCCTGATGGAGAAGCTGACAGATGCCAAGGACA TCAGGAACCTGGCCTTCCCTGGGCATTGCTTACAACACCTGCTGCGCATTGCCGAAATGCCAGAATCAGAGTG AAGGACATCTCCCGCACCGATGGTGGGAGAATGCTGATCCACATTGGCAGGACCAAGACCCTGGTGTCCACAG CTGGTGTGGAGAAGGCCCTGTCCCTGGGGGTACCAAGCTGGTGGAGAGATGGATCTCTGTGTCTGGTGTGGC TGATGACCCCAACAACACTGTTCTGCCGGGTGAGGATGAGGATGGTGGTGGCTGCCCTTCTGCCACCTCCCAAC TGTCACCCGGGCCCTGGAAGGGATCTTTGAGGCCACCCACCGCCTGATCTATGGTCCAAGGATGACTCTGG GCAGAGATACCTGGCCTGGCTGGCCACTGCCCAGATGGGTGCTGCCAGGGACATGGCCAGGCTGGTGT GTCCATCCCTGAAATCATGCAGGCTGGTGGCTGGACCAATGTGAACATTGTGATGAACATCATCAGAAACCTGGA

```
CTCTGAGACTGGGGCCATGGTGAGGCTGCTCGAGGATGGGGACGGCAGTGGAGGATCCGGAGCCACGAACTT
CTCTCTGTAAAGCAAGCAGGAGACGTGGAAGAAAACCCCGGTCTTACCGGTGTGAGCAAGGGCGAGGAGGAT
AACATGGCCATCATCAAGGAGTTCATGCGCTTCAAGGTGCACATGGAGGGCTCCGTGAACGGCCACGAGTTCGA
GATCGAGGGCGAGGGCGAGGGCCGCCCTACGAGGGCACCCAGACCGCCAAGCTGAAGGTGACCAAGGGTG
GCCCCCTGCCCTTCGCCCTGGGACATCCTGTCCCCTCAGTTCATGTACGGCTCCAAGGCCTACGTGAAGCACCC
CGCCGACATCCCCGACTACTTGAAGCTGTCTTCCCCGAGGGCTTCAAGTGGGAGCGCGTGATGAACTTCGAG
GACGGCGGGCTGGTGACCGTGACCCAGGACTCCTCCCTGCAGGACGGCGAGTTCATCTACAAGGTGAAGCTG
GACGGCACCAACTTCCCCTCCGACGGCCCCGTAATGCAGAAGAAGACCATGGGCTGGGAGGCCTCCTCCGAG
CGGATGTACCCGAGGACGGCGCCCTGAAGGGCGAGATCAAGCAGAGGCTGAAGCTGAAGGACGGCGGCCAC
TACGACGCTGAGGTCAAGACCACCTACAAGGCCAAGAAGCCCGTGCAGCTGCCGGCGCCTACAACGTCAACA
TCAAGTTGGACATCACCTCCACAACGAGGACTACACCATCGTGAACAGTACGAACGGCGCGGAGGGCCGCCA
CTCCACCGGGCATGGACGAGCTGTACAAGGGATATCTCAGCCATGGCTTCCCGCCGGAGGTGGAGGAGCAG
GATGATGGCACGCTGCCCATGCTTGTGCCAGGAGAGCGGGATGGACCGTACCCTGCAGCCTGTGCTTCTG
CTAGGATCAATGTGTGACTCGAGGGCGCGCTACCCGCGGTAGCTTTTCAGTCTGAGAAAAAACATTAGATCAGA
AGAACAACTGGCAACACTTCTCAACCTGAGACTTACTTCAAGATGCTCGATCCTGGAGAGGTCTATGATGACCCT
ATTGACCCAATCGAGTTAGAGGCTGAACCCAGAGGAACCCCATGTCCCAAC
```

Arg189Ile mutation in iCre gene of SiR-CRE

```
AGCGGGGT
CAACTCCAACCTTGGGAGCAATATAACAAAAACATGTTATGGTGCCATTAAACCGCTGCATTTTCATCAAAGTCA
AGTTGATTACCTTTACATTTTATCCTCTTGGATTGTGAAAAAACTATTAACATCCCTCAAAGGACCTGCAGGTACG
CGGCCGCGGTACCGCACCATGGTGGCCAAAGAAGAAGAGGAAAGTCTCCAACCTGCTGACTGTGCACAAAAAC
CTGCCTGCCCTCCCTGTGGATGCCACCTCTGATGAAGTCAGGAAGAACCTGATGGACATGTTTCAGGGACAGGCCA
GGCCTTCTCTGAACACACCTGGAAGATGCTCCTGTCTGTGTGCAGATCCTGGGCTGCCTGGTGCAAGCTGAACA
ACAGGAAATGGTTCCCTGCTGAACCTGAGGATGTGAGGGACTACCTCCTGTACCTGCAAGCCAGAGGCCTGGC
TGTGAAGACCATCCAACAGCACCTGGGCCAGCTCAACATGCTGCACAGGAGATCTGGCCTGCCTCGCCCTTCT
GACTCCAATGCTGTGTCCCTGGTGATGAGGAGAATCAGAAAGGAGAATGTGGATGCTGGGGAGAGAGCCAAGC
AGGCCCTGGCCTTTGAACGCACTGACTTTGACCAAGTCAGATCCCTGATGGAGAACTCTGACAGATGCCAGGAC
ATCAGGAACCTGGCCTTCTGGGCATTGCCTACAACACCTGCTGCGCATTGCCGAAATTGCCAGAATCAIAGTG
AAGGACATCTCCCGCACCGATGGTGGGAGAATGCTGATCCACATTGGCAGGACCAAGACCCTGGTGTCCACAG
CTGGTGTGGAGAAGGCCCTGTCCCTGGGGGTTACCAAGCTGGTGGAGAGATGGATCTCTGTGTCTGGTGTGGC
TGATGACCCCAACAACCTACCTGTTCTGCCGGGTGAGAAAGAAATGGTGTGGCTGCCCTTCTGCCACCTCCCAAC
TGTCACCCGGGGCCCTGGAAGGGATCTTTGAGGCCACCCACCGCTGATCTATGGTGCCAAGGATGACTCTGG
GCAGAGATACCTGGCCTGGTCTGGCCACTCTGCCAGAGTGGGTGCTGCCAGGGACATGGCCAGGGCTGGTGT
GTCCATCCCTGAAATCATGCAGGCTGGTGGCTGGACCAATGTGAACATTGTGATGAACTACATCAGAAACCTGGA
CTCTGAGACTGGGGCCATGGTGAGGCTGCTCGAGGATGGGGACGGCAGTGGAGGATCCGGAGCCACGAACTT
CTCTCTGTAAAGCAAGCAGGAGACGTGGAAGAAAACCCCGGTCTTACCGGTGTGAGCAAGGGCGAGGAGGAT
AACATGGCCATCATCAAGGAGTTCATGCGCTTCAAGGTGCACATGGAGGGCTCCGTGAACGGCCACGAGTTCGA
GATCGAGGGCGAGGGCGAGGGCCGCCCTACGAGGGCACCCAGACCGCCAAGCTGAAGGTGACCAAGGGTG
GCCCCCTGCCCTTCGCCCTGGGACATCCTGTCCCCTCAGTTCATGTACGGCTCCAAGGCCTACGTGAAGCACCC
CGCCGACATCCCCGACTACTTGAAGCTGTCTTCCCCGAGGGCTTCAAGTGGGAGCGCGTGATGAACTTCGAG
GACGGCGGGCTGGTGACCGTGACCCAGGACTCCTCCCTGCAGGACGGCGAGTTCATCTACAAGGTGAAGCTG
CGGGCACCAACTTCCCCTCCGACGGCCCCGTAATGCAGAAGAAGACCATGGGCTGGGAGGCCTCCTCCGAG
CGGATGTACCCGAGGACGGCGCCCTGAAGGGCGAGATCAAGCAGAGGCTGAAGCTGAAGGACGGCGGCCAC
TACGACGCTGAGGTCAAGACCACCTACAAGGCCAAGAAGCCCGTGCAGCTGCCGGCGCCTACAACGTCAACA
TCAAGTTGGACATCACCTCCACAACGAGGACTACACCATCGTGAACAGTACGAACGGCGCGGAGGGCCGCCA
CTCCACCGGGCGCATGGACGAGCTGTACAAGGGATATCTCAGCCATGGCTTCCCGCCGGAGGTGGAGGAGCAG
GATGATGGCACGCTGCCCATGCTTGTGCCAGGAGAGCGGGATGGACCGTACCCTGCAGCCTGTGCTTCTG
CTAGGATCAATGTGTGACTCGAGGGCGCGCTACCCGCGGTAGCTTTTCAGTCTGAGAAAAAACATTAGATCAGA
AGAACAACTGGCAACACTTCTCAACCTGAGACTTACTTCAAGATGCTCGATCCTGGAGAGGTCTATGATGACCCT
ATTGACCCAATCGAGTTAGAGGCTGAACCCAGAGGAACCCCATGTCCCAAC
```

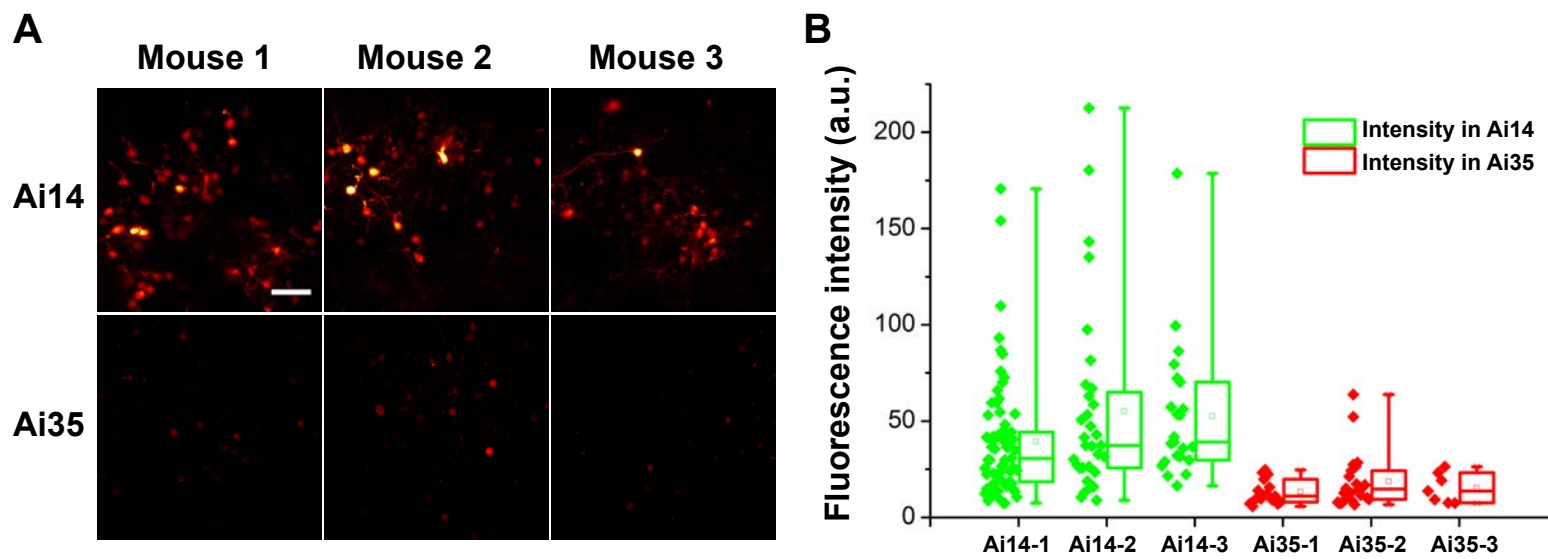

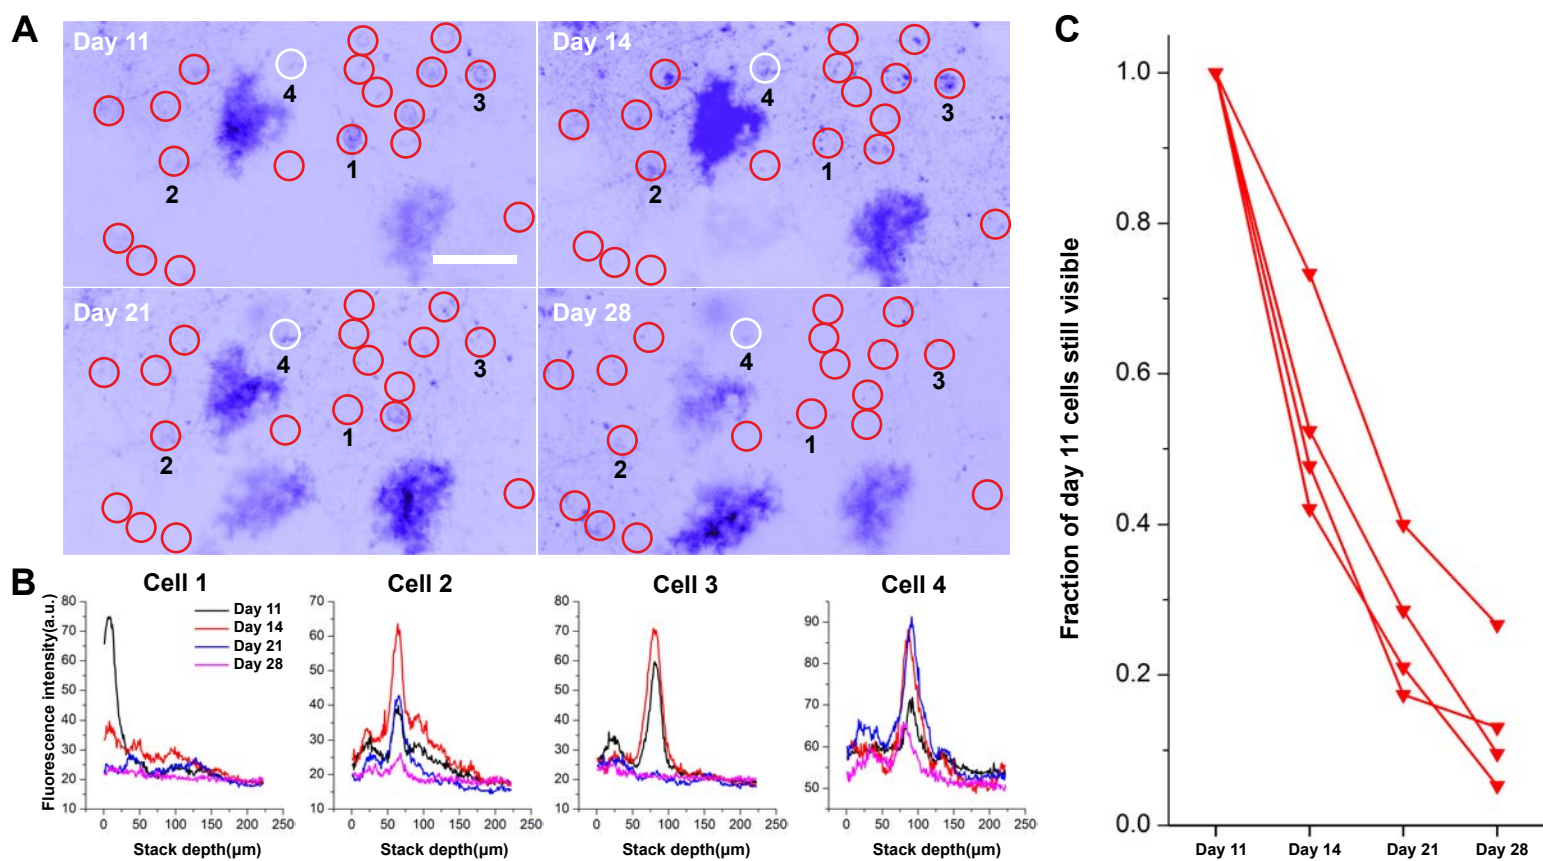

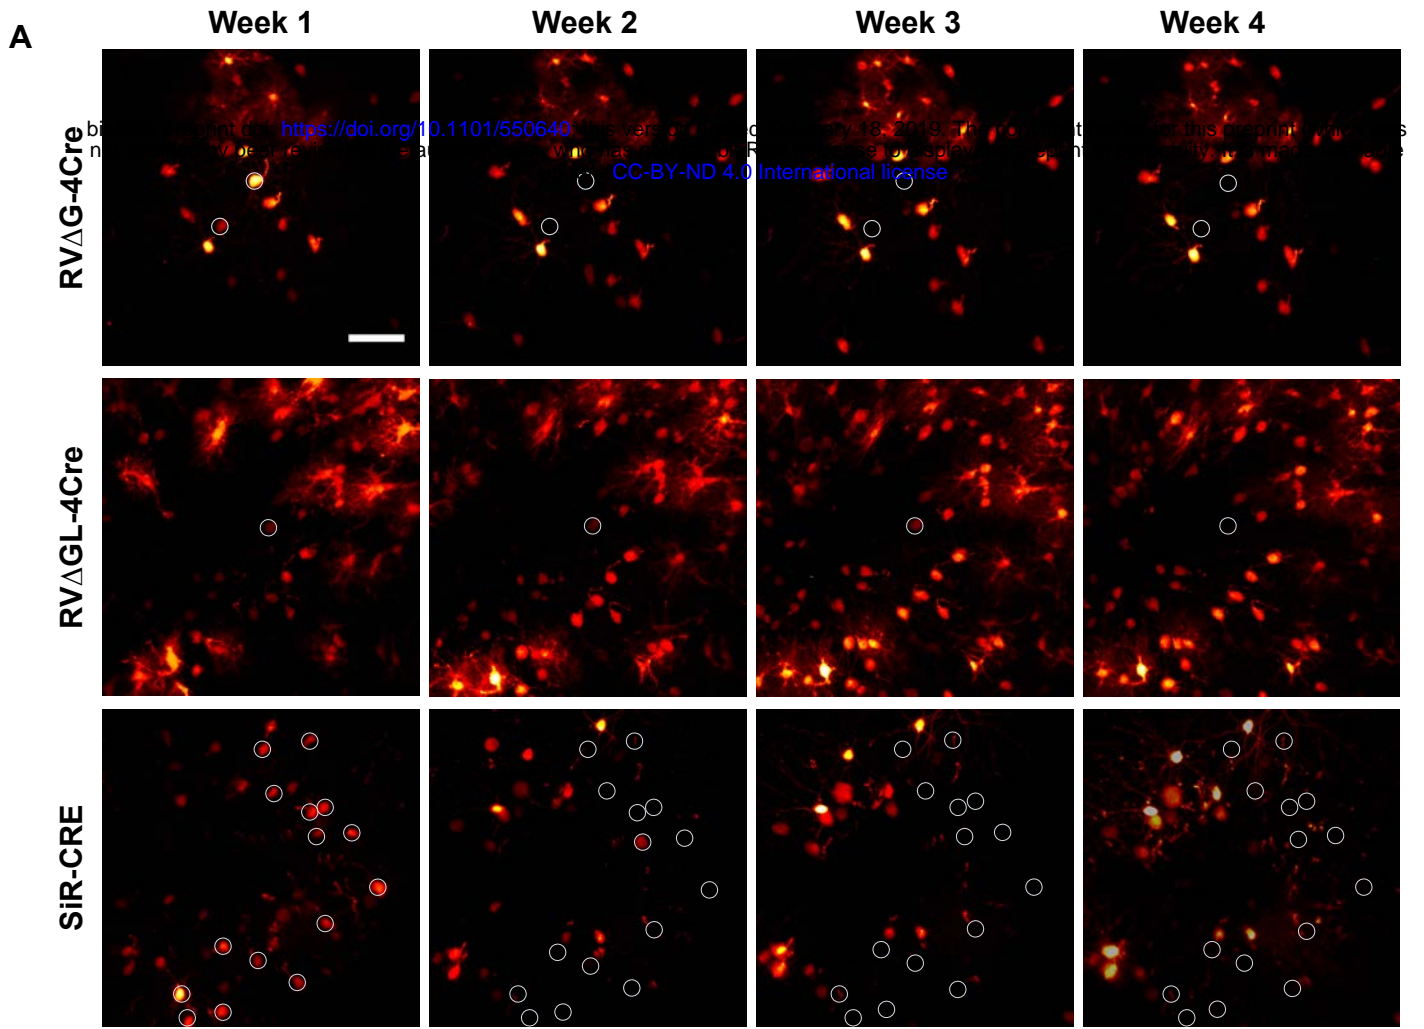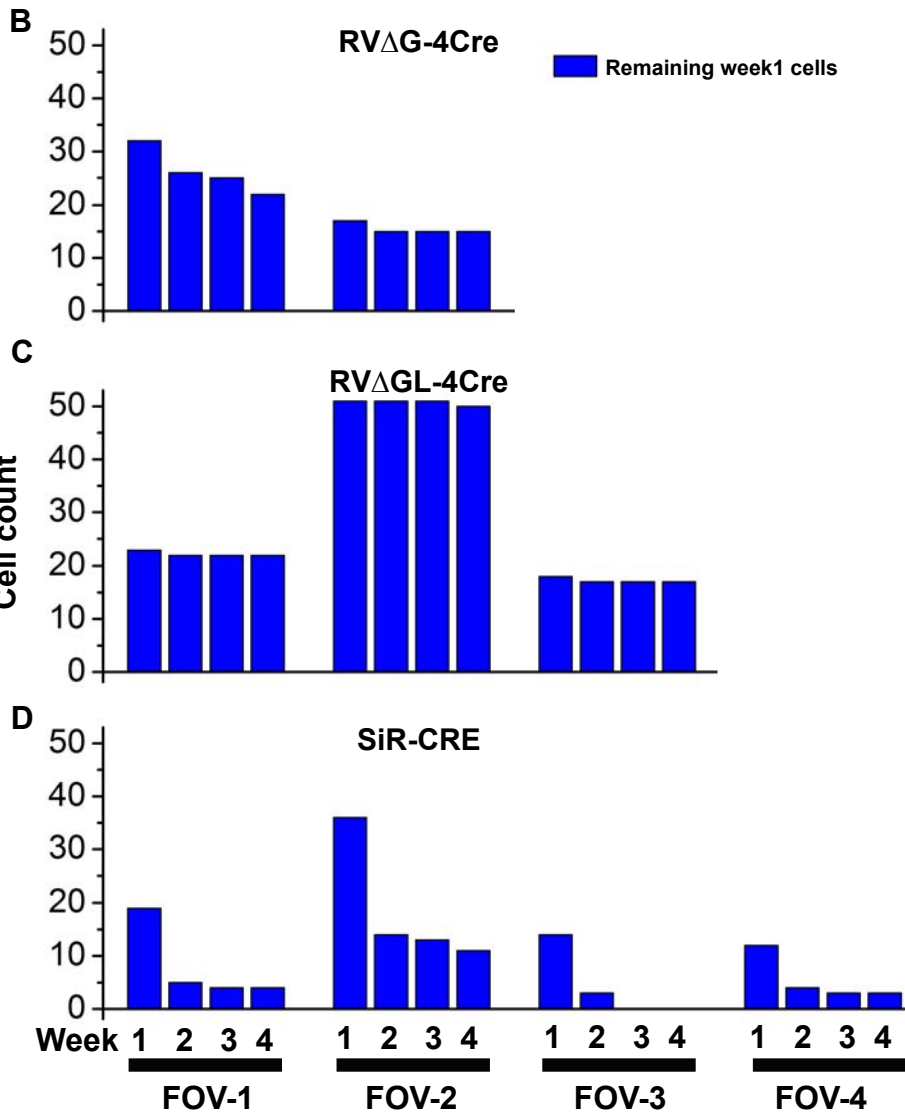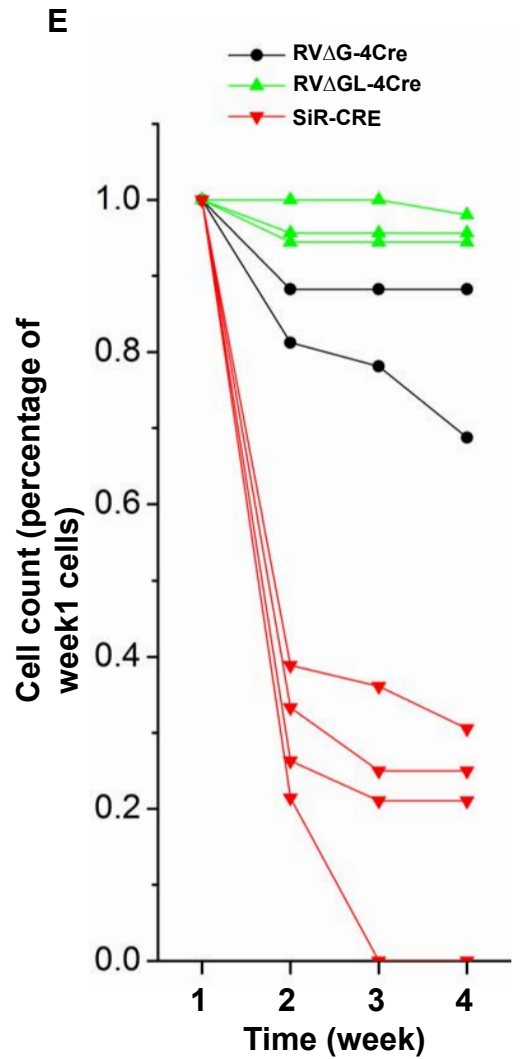

Random 8-nucleotide index

N gene, tobacco etch virus protease cleavage site, PEST, transcription stop/polyA signal, mutation

Gly453\* in N-TEV-PEST of SiR-CRE (50/51 clones)

TCTCGGAA, TTATGGGC, CCTGCCGA, CGTCGTTG, ACTCTAGT, GATCCGGT, ATTATGTA, TATTATCC, ATGCTAGA, GTTGTTTC, GAGTCGAC, GTCGACCT, CAAGAGTA, CGAAGCCA, GCGTGATA, CGTCCAGA, CTTGGTCC, GGGGTTTT, GTCCATAC, GTTTAATA, CAAAATCC, GTGGAGGC, CGGAAGGT, AGGACGGG, CCTCGGGA, GCATTTGC, TGGTTCGG, ATTTAGTC, ATGGGTAA, CTACGGGG, CCTGGTAC, GCATTTCA, AGTGTAGG, CGCATAGA, GTCACAAT, GTATGCTT, TCGGGTTT, ATGTTGTC, CAGCCGTA, GAGTGGCC, GGCCATT, GGATTTCC, GTACAAGC, GAAGATAT, AACAGAT, AAGGCCTT, CGTTCGTC, AAAGACTA, ACTGAAAG, TGGGGATA

ATCATCAAGCCCCTCCAAACTCATTGCGCCGAGTTTCTAAACAAGACATATTCGAGTGACTCAAGTTCCGAGAGA  
ACCTCTACTTCCAATCGGGATCCGGTAGCCATGGCTTCCC GCCGGAGGTGGAGGAGCAGGATGATGGCACGCT  
GCCCATGTCTTGTGCCAGGAGAGCGGGATGGACCGTCACCCTGCAGCCTGTGCTTCTGCTAGGATCAATGTGT  
AAGAAGTTGAATAACAAAATGCCGGAATCTACGGATTGTGTATATCCATCATGAAAAAAA

Asp449Glufs\*16 in N-TEV-PEST of SiR-CRE (1/51 clones)

AGGCTAAC

ATCATCAAGCCCCTCCAAACTCATTGCGCCGAGTTTCTAAACAAGACATATTCGAGTGAACTCAAGTTCCGAGAGA  
AACCTCTACTTCCAATCGGGATCCGGTAGCCATGGCTTCCC GCCGGAGGTGGAGGAGCAGGATGATGGCACGCT  
TGCCCATGTCTTGTGCCAGGAGAGCGGGATGGACCGTCACCCTGCAGCCTGTGCTTCTGCTAGGATCAATGTGT  
TAAAGAAGTTGAATAACAAAATGCCGGAATCTACGGATTGTGTATATCCATCATGAAAAAAA

No mutations in sequenced region of N-TEV-PEST of SiR-FLPo (4/50 clones)

TCATTAT, AAGTCGAA, TGAATACA, TATACAGC

ATCATCAAGCCCCTCCAAACTCATTGCGCCGAGTTTCTAAACAAGACATATTCGAGTGACTCAAGTTCCGAGAGA  
ACCTCTACTTCCAATCGGGATCCGGTAGCCATGGCTTCCC GCCGGAGGTGGAGGAGCAGGATGATGGCACGCT  
GCCCATGTCTTGTGCCAGGAGAGCGGGATGGACCGTCACCCTGCAGCCTGTGCTTCTGCTAGGATCAATGTGT  
AAGAAGTTGAATAACAAAATGCCGGAATCTACGGATTGTGTATATCCATCATGAAAAAAA

Gly453\* in N-TEV-PEST of SiR-FLPo (18/50 clones)

GAGGCCGC, CTTATCAC, TCAGTTTT, CTTACGCA, TTACTTTT, AAAATAAG, CCATTTCT, GTCACATT, GCATACGG, AGTATTAA, CCGGGTTG, GGTAATAA, CAGGGAGA, CATTTTTT, TGACAAAT, TCGTATAT, TAGGGATT, GATCCCCG

ATCATCAAGCCCCTCCAAACTCATTGCGCCGAGTTTCTAAACAAGACATATTCGAGTGACTCAAGTTCCGAGAGA  
ACCTCTACTTCCAATCGGGATCCGGTAGCCATGGCTTCCC GCCGGAGGTGGAGGAGCAGGATGATGGCACGCT  
GCCCATGTCTTGTGCCAGGAGAGCGGGATGGACCGTCACCCTGCAGCCTGTGCTTCTGCTAGGATCAATGTGT  
AAGAAGTTGAATAACAAAATGCCGGAATCTACGGATTGTGTATATCCATCATGAAAAAAA

Ser450\* in N-TEV-PEST of SiR-FLPo (28/50 clones)

TACTAAAT, TTCAACTA, TAATAGGC, CGCGGGTC, AGGGTGCC, TTGCTGAC, CGGCCCTT, TACAGCGA, GAGTAGGA, GTAAACGC, CTATGGGT, TTGATTGA, AGGATTCT, GAGGTTTG, TACTTAGC, CCTGTAGT, GGGGTGGA, TTAAGTTG, CTCAATGA, CAGATCTG, GTCTGGTA, GCGTTGGG, TAAACGAG, TACTTGAG, CGGGGTGT, CGATCCCG, TGGGTGTC, GCCACGAT

ATCATCAAGCCCCTCCAAACTCATTGCGCCGAGTTTCTAAACAAGACATATTCGAGTGACTCAAGTTCCGAGAGA  
ACCTCTACTTCCAATCGGGATCCGGTAGCCATGGCTTCCC GCCGGAGGTGGAGGAGCAGGATGATGGCACGCT  
GCCCATGTCTTGTGCCAGGAGAGCGGGATGGACCGTCACCCTGCAGCCTGTGCTTCTGCTAGGATCAATGTGT  
AAGAAGTTGAATAACAAAATGCCGGAATCTACGGATTGTGTATATCCATCATGAAAAAAA

No mutations in sequenced region of RVΔG-4mCherry (51/51 clones)

CGCCCCGC, GCCAATCT, GGCGGAAT, TGTGGAAC, GGAGGGAT, CGTAGTGT, AGAATCTC, TGTCTGGC, GCCTTTTA, TGGAACTC, TTGTAATG, AGGCCTGT, CGGATATA, AATCCAAA, AAGGAAAA, GAACATC, GCCGCTTC, CTTTGCCG, CGCAACCT, TCGGGCAT, GGGCGACT, AACTGGAT, TCGTCCG, TCAAAGCG, CGAGGCC, ATGTAGGA, AGATACGT, TGGCTTCG, ATTTCTA, TCGTCCGG, TCGGAGCG, CTGTTATA, TACCGTTC, CGAATGTC, CCCTCTT, TGAGTGGG, TGTAATA, AAGGAGTC, ATTACCCT, TCCCTGAC, TGGTAAA, ACTATCTC, CCGGAAGC, CTTGGAGG, GCAACAAT, ATTACCGT, AATAGCAG, ACCATAGT, GGGTTGGT, CATTTATT, GGGTACAC

ATCATCAAGCCCCTCCAAACTCATTGCGCCGAGTTTCTAAACAAGACATATTCGAGTGACTCATAAAGAAGTTGAATA  
ACAAAATGCCGGAATCTACGGATTGTGTATATCCATCATGAAAAAAA

## SINGLE-MOLECULE, REAL-TIME SEQUENCING RESULTS

### Frameshifts and insertions

Position numbers in this file refer to the reference sequences included as Supplementary Files S4-S5. A "frameshift" is included in Tables 1a-2b if the number of deleted bases in positions 1439-1492 (the vicinity of the junction of the end of the N gene and the intended 3' addition) is not an integer multiple of 3, with insertions ignored. "Any error" includes either the apparent frameshifts, or the new TAA/TAG/TGA stop codons, or both, with insertions ignored. The number of "frameshifts" increases considerably if insertion mutations are included in the calculation, indicating that there is a much higher insertion rate as compared to that of deletion; however, previous studies have found that spurious insertions are high with SMRT (see main text), so we ignore insertions in this paper apart from summarizing the data below.

| SiR-CRE                    |                                                                        |       |      |      |
|----------------------------|------------------------------------------------------------------------|-------|------|------|
| Position                   | Mutation                                                               | CCS3  | CCS5 | CCS8 |
| # Sequences                |                                                                        | 22205 | 866  | 239  |
| 243                        | <b>GAT (reference)</b>                                                 | 20273 | 784  | 209  |
|                            | GCT                                                                    | 3     | 0    | 0    |
|                            | GGT                                                                    | 5     | 0    | 0    |
|                            | GTT                                                                    | 1856  | 79   | 29   |
|                            | DEL                                                                    | 68    | 3    | 1    |
| 1111                       | <b>GAA (reference)</b>                                                 | 19807 | 760  | 197  |
|                            | GAC                                                                    | 1     | 0    | 0    |
|                            | GAG                                                                    | 2396  | 105  | 42   |
|                            | GAT                                                                    | 0     | 0    | 0    |
|                            | DEL                                                                    | 1     | 1    | 0    |
| 1457                       | AGA                                                                    | 6     | 0    | 0    |
|                            | CGA                                                                    | 1     | 0    | 0    |
|                            | <b>GGA (reference)</b>                                                 | 140   | 5    | 1    |
|                            | TGA                                                                    | 22032 | 858  | 237  |
|                            | DEL                                                                    | 26    | 3    | 1    |
| [1439, 1492]               | Frame shift<br>(#DELs not an integer multiple of 3, Insertion ignored) | 507   | 13   | 3    |
| [1439, 1492]               | Any error (insertion ignored)                                          | 22104 | 864  | 239  |
| % mutation in [1439, 1492] |                                                                        | 100%  | 100% | 100% |

Table 1a. All mutations in the SiR-CRE sample at positions mutated at >2% frequency at all stringencies (CCS3, CCS5, CCS8), as well as frameshift mutations found in the C-terminal region of N.

| SiR-CRE      |                                                                                                        |       |      |     |
|--------------|--------------------------------------------------------------------------------------------------------|-------|------|-----|
| Position     | Mutation                                                                                               | CCS3  | CCS5 | CC8 |
| [1439, 1492] | Number of frame shifts due to DEL (number of DELs not an integer multiple of 3, insertion ignored)     | 507   | 13   | 3   |
| [1439, 1492] | Number of frame shifts due to either DEL or INS or both (Sequence length not an integer multiple of 3) | 2504  | 89   | 14  |
| [1439, 1492] | Any error (insertion included)                                                                         | 22174 | 865  | 239 |

Table 1b. Frameshift mutations in the C-terminal region of N in the SiR-CRE sample at positions mutated at >2% frequency at all stringencies (CCS3, CCS5, CCS8).



| SiR-FLPo             |                                                                        |            |            |            |
|----------------------|------------------------------------------------------------------------|------------|------------|------------|
| Position             | Mutation                                                               | CCS3       | CCS5       | CCS8       |
| <b>#Sequences</b>    |                                                                        | 17086      | 695        | 210        |
| <b>1449</b>          | TAA                                                                    | 28         | 1          | 0          |
|                      | <b>TCA (reference)</b>                                                 | 8405       | 333        | 94         |
|                      | TGA                                                                    | 8624       | 360        | 115        |
|                      | TTA                                                                    | 3          | 0          | 0          |
|                      | DEL                                                                    | 26         | 1          | 1          |
| <b>1457</b>          | AGA                                                                    | 3          | 0          | 0          |
|                      | CGA                                                                    | 0          | 0          | 0          |
|                      | <b>GGA (reference)</b>                                                 | 11088      | 462        | 139        |
|                      | TGA                                                                    | 5979       | 233        | 71         |
|                      | DEL                                                                    | 16         | 0          | 0          |
| <b>[1439, 1492]</b>  | Frameshifts<br>(#DELS not an integer multiple of 3, Insertion ignored) | 448        | 11         | 3          |
| <b>[1439, 1492]</b>  | Any error (insertion ignored)                                          | 14444      | 589        | 180        |
| <b>% of mutation</b> |                                                                        | <b>85%</b> | <b>85%</b> | <b>86%</b> |

Table 2a. All mutations in the SiR-FLPo sample at positions mutated at >2% frequency at all stringencies (CCS3, CCS5, CCS8), as well as frameshift mutations found in the C-terminal region of N.

| SiR-FLPo     |                                                                                                        |       |      |      |
|--------------|--------------------------------------------------------------------------------------------------------|-------|------|------|
| Position     | Mutation                                                                                               | CCS3  | CCS5 | CCS8 |
| [1439, 1492] | Number of frame shifts due to DEL (number of DELs not an integer multiple of 3, insertion ignored)     | 448   | 11   | 3    |
| [1439, 1492] | Number of frame shifts due to either DEL or INS or both (Sequence length not an integer multiple of 3) | 3562  | 121  | 24   |
| [1439, 1492] | Any error (insertion included)                                                                         | 15818 | 642  | 196  |

Table 2b. Frameshift mutations in the C-terminal region of N in the SiR-FLPo sample at positions mutated at >2% frequency at all stringencies (CCS3, CCS5, CCS8).

| RV $\Delta$ G-4Cre |                        |       |      |     |
|--------------------|------------------------|-------|------|-----|
| Position           | Mutation               | CCS3  | CCS5 | CC8 |
| <b># Sequences</b> |                        | 17978 | 757  | 254 |
| <b>1355</b>        | ACT                    | 1706  | 84   | 28  |
|                    | CCT                    | 3     | 0    | 0   |
|                    | GCT                    | 1     | 1    | 1   |
|                    | <b>TCT (reference)</b> | 16139 | 667  | 224 |
|                    | DEL                    | 129   | 5    | 1   |
| <b>Total</b>       |                        |       |      |     |

Table 3. All mutations in the SiR-FLPo sample at positions mutated at >2% frequency at all stringencies (CCS3, CCS5, CCS8).

### Tables of all mutations above 2% frequency threshold

Table 4a to 4c list all single-nucleotide substitutions and deletions at positions mutated at >2% threshold frequency. The percentage of mutations is calculated based on the total number of single nucleotide and deletion mutations divided by the total number of reads aligned, when insertion mutations are ignored. Deletion mutations dominate in the medium-frequency range between 2% and 5%.

|      | Reference | Position | A     | C     | G     | T     | DEL   | Un-mutated | Mutated (SNP/DEL) | % Mutation (SNP/DEL) |
|------|-----------|----------|-------|-------|-------|-------|-------|------------|-------------------|----------------------|
| CCS3 | G         | 1457     | 6     | 1     | 140   | 22032 | 26    | 140        | 22065             | 99.4                 |
|      | A         | 1111     | 19807 | 1     | 2396  | 0     | 1     | 19807      | 2398              | 10.8                 |
|      | A         | 243      | 20273 | 3     | 5     | 1856  | 68    | 20273      | 1932              | 8.7                  |
|      | T         | 615      | 4     | 0     | 2     | 21229 | 970   | 21229      | 976               | 4.4                  |
|      | G         | 1124     | 5     | 0     | 21356 | 7     | 837   | 21356      | 849               | 3.8                  |
|      | A         | 81       | 21358 | 9     | 2     | 0     | 836   | 21358      | 847               | 3.8                  |
|      | A         | 31       | 21381 | 0     | 0     | 0     | 824   | 21381      | 824               | 3.7                  |
|      | T         | 713      | 1     | 2     | 4     | 21487 | 711   | 21487      | 718               | 3.2                  |
|      | T         | 338      | 0     | 0     | 9     | 21498 | 698   | 21498      | 707               | 3.2                  |
|      | A         | 1665     | 21544 | 1     | 4     | 0     | 656   | 21544      | 661               | 3.0                  |
|      | A         | 53       | 21606 | 0     | 0     | 1     | 598   | 21606      | 599               | 2.7                  |
|      | C         | 411      | 8     | 21683 | 0     | 1     | 513   | 21683      | 522               | 2.4                  |
| A    | 838       | 21718    | 1     | 0     | 1     | 485   | 21718 | 487        | 2.2               |                      |
| CCS5 | G         | 1457     | 0     | 0     | 5     | 858   | 3     | 5          | 861               | 99.4                 |
|      | A         | 1111     | 760   | 0     | 105   | 0     | 1     | 760        | 106               | 12.2                 |
|      | A         | 243      | 784   | 0     | 0     | 79    | 3     | 784        | 82                | 9.5                  |
|      | A         | 31       | 828   | 0     | 0     | 0     | 38    | 828        | 38                | 4.4                  |
|      | G         | 1124     | 0     | 0     | 831   | 0     | 35    | 831        | 35                | 4.0                  |
|      | T         | 615      | 0     | 0     | 0     | 834   | 32    | 834        | 32                | 3.7                  |
|      | A         | 81       | 837   | 1     | 1     | 0     | 27    | 837        | 29                | 3.3                  |
|      | T         | 338      | 0     | 0     | 1     | 840   | 25    | 840        | 26                | 3.0                  |
|      | T         | 713      | 0     | 0     | 1     | 841   | 24    | 841        | 25                | 2.9                  |
|      | C         | 411      | 0     | 843   | 0     | 0     | 23    | 843        | 23                | 2.7                  |
|      | A         | 53       | 846   | 0     | 0     | 0     | 20    | 846        | 20                | 2.3                  |
| CCS8 | G         | 1457     | 0     | 0     | 1     | 237   | 1     | 1          | 238               | 99.6                 |
|      | A         | 1111     | 197   | 0     | 42    | 0     | 0     | 197        | 42                | 17.6                 |
|      | A         | 243      | 209   | 0     | 0     | 29    | 1     | 209        | 30                | 12.6                 |
|      | A         | 31       | 228   | 0     | 0     | 0     | 11    | 228        | 11                | 4.6                  |
|      | T         | 615      | 0     | 0     | 0     | 232   | 7     | 232        | 7                 | 2.9                  |
|      | G         | 1124     | 0     | 0     | 232   | 0     | 7     | 232        | 7                 | 2.9                  |
| C    | 411       | 0        | 233   | 0     | 0     | 6     | 233   | 6          | 2.5               |                      |

Table 4a. SiR-CRE: substitutions and deletions at positions mutated at >2% frequency at all stringencies (CCS3, CCS5, CCS8).

|      | Reference | Position | A     | C     | G     | T     | DEL   | Un-mutated | Mutated (SNP/DEL) | % Mutation (SNP/DEL) |
|------|-----------|----------|-------|-------|-------|-------|-------|------------|-------------------|----------------------|
| CCS3 | C         | 1449     | 28    | 8405  | 8624  | 3     | 26    | 8405       | 8681              | 50.8                 |
|      | G         | 1457     | 3     | 0     | 11088 | 5979  | 16    | 11088      | 5998              | 35.1                 |
|      | T         | 615      | 4     | 0     | 0     | 16322 | 760   | 16322      | 764               | 4.5                  |
|      | A         | 81       | 16410 | 4     | 2     | 5     | 665   | 16410      | 676               | 4.0                  |
|      | G         | 1124     | 0     | 0     | 16410 | 3     | 673   | 16410      | 676               | 4.0                  |
|      | T         | 713      | 1     | 0     | 2     | 16500 | 583   | 16500      | 586               | 3.4                  |
|      | A         | 1665     | 16536 | 1     | 1     | 0     | 548   | 16536      | 550               | 3.2                  |
|      | A         | 31       | 16547 | 0     | 0     | 0     | 539   | 16547      | 539               | 3.2                  |
|      | T         | 338      | 0     | 1     | 4     | 16582 | 499   | 16582      | 504               | 2.9                  |
|      | A         | 53       | 16672 | 2     | 2     | 0     | 410   | 16672      | 414               | 2.4                  |
|      | C         | 411      | 6     | 16683 | 1     | 0     | 396   | 16683      | 403               | 2.4                  |
|      | A         | 838      | 16696 | 0     | 0     | 0     | 390   | 16696      | 390               | 2.3                  |
| G    | 208       | 301      | 0     | 16739 | 44    | 2     | 16739 | 347        | 2.0               |                      |
| CCS5 | C         | 1449     | 1     | 333   | 360   | 0     | 1     | 333        | 362               | 52.1                 |
|      | G         | 1457     | 0     | 0     | 462   | 233   | 0     | 462        | 233               | 33.5                 |
|      | A         | 81       | 665   | 0     | 0     | 0     | 30    | 665        | 30                | 4.3                  |
|      | T         | 615      | 1     | 0     | 0     | 668   | 26    | 668        | 27                | 3.9                  |
|      | A         | 1665     | 669   | 0     | 1     | 0     | 25    | 669        | 26                | 3.7                  |
|      | T         | 713      | 0     | 0     | 0     | 671   | 24    | 671        | 24                | 3.5                  |
|      | T         | 338      | 0     | 0     | 0     | 673   | 22    | 673        | 22                | 3.2                  |
|      | C         | 411      | 0     | 676   | 0     | 0     | 19    | 676        | 19                | 2.7                  |
|      | G         | 1124     | 0     | 0     | 676   | 0     | 19    | 676        | 19                | 2.7                  |
|      | A         | 838      | 679   | 0     | 0     | 0     | 16    | 679        | 16                | 2.3                  |
|      | G         | 346      | 0     | 0     | 680   | 0     | 15    | 680        | 15                | 2.2                  |
|      | A         | 31       | 681   | 0     | 0     | 0     | 14    | 681        | 14                | 2.0                  |
| CCS8 | C         | 1449     | 0     | 94    | 115   | 0     | 1     | 94         | 116               | 55.2                 |
|      | G         | 1457     | 0     | 0     | 139   | 71    | 0     | 139        | 71                | 33.8                 |
|      | T         | 713      | 0     | 0     | 0     | 203   | 7     | 203        | 7                 | 3.3                  |
|      | A         | 53       | 205   | 0     | 0     | 0     | 5     | 205        | 5                 | 2.4                  |
|      | A         | 81       | 205   | 0     | 0     | 0     | 5     | 205        | 5                 | 2.4                  |

Table 4b. SiR-FLPo: substitutions and deletions at positions mutated at >2% frequency at all stringencies (CCS3, CCS5, CCS8).

|      | Reference | Position | A     | C | G     | T     | DEL  | Un-mutated | Mutated (SNP/DEL) | % Mutation (SNP/DEL) |
|------|-----------|----------|-------|---|-------|-------|------|------------|-------------------|----------------------|
| CCS3 | T         | 1355     | 1706  | 3 | 1     | 16139 | 129  | 16139      | 1839              | 10.2                 |
|      | A         | 31       | 16732 | 0 | 0     | 0     | 1246 | 16732      | 1246              | 6.9                  |
|      | T         | 615      | 2     | 0 | 1     | 17266 | 709  | 17266      | 712               | 4.0                  |
|      | A         | 81       | 17300 | 4 | 2     | 1     | 671  | 17300      | 678               | 3.8                  |
|      | G         | 1124     | 0     | 0 | 17379 | 4     | 595  | 17379      | 599               | 3.3                  |
|      | T         | 713      | 0     | 1 | 1     | 17469 | 507  | 17469      | 509               | 2.8                  |
|      | T         | 338      | 1     | 0 | 2     | 17503 | 472  | 17503      | 475               | 2.6                  |
|      | A         | 1506     | 17520 | 0 | 0     | 0     | 458  | 17520      | 458               | 2.5                  |
|      | A         | 53       | 17579 | 1 | 2     | 1     | 395  | 17579      | 399               | 2.2                  |
| CCS5 | T         | 1355     | 84    | 0 | 1     | 667   | 5    | 667        | 90                | 11.9                 |
|      | A         | 31       | 703   | 0 | 0     | 0     | 54   | 703        | 54                | 7.1                  |
|      | A         | 81       | 717   | 0 | 0     | 0     | 40   | 717        | 40                | 5.3                  |
|      | T         | 615      | 0     | 0 | 0     | 729   | 28   | 729        | 28                | 3.7                  |
|      | G         | 1124     | 0     | 0 | 738   | 0     | 19   | 738        | 19                | 2.5                  |
|      | A         | 53       | 739   | 0 | 0     | 0     | 18   | 739        | 18                | 2.4                  |
|      | T         | 713      | 0     | 0 | 0     | 740   | 17   | 740        | 17                | 2.2                  |
|      | A         | 1506     | 740   | 0 | 0     | 0     | 17   | 740        | 17                | 2.2                  |
| CCS8 | T         | 1355     | 28    | 0 | 1     | 224   | 1    | 224        | 30                | 11.8                 |
|      | A         | 31       | 241   | 0 | 0     | 0     | 13   | 241        | 13                | 5.1                  |
|      | T         | 615      | 0     | 0 | 0     | 248   | 6    | 248        | 6                 | 2.4                  |

Table 4c. RVΔG-4Cre: substitutions and deletions at positions mutated at >2% frequency at all stringencies (CCS3, CCS5, CCS8).

LOCUS Exported 2183 bp ds-DNA linear SYN  
07-JAN-2019  
DEFINITION synthetic linear DNA.  
ACCESSION .  
VERSION .  
KEYWORDS .  
SOURCE synthetic DNA construct  
ORGANISM synthetic DNA construct  
REFERENCE 1 (bases 1 to 2183)  
AUTHORS Trial User  
TITLE Direct Submission  
JOURNAL Exported Jan 7, 2019 from SnapGene 4.1.9  
<http://www.snapgene.com>

FEATURES Location/Qualifiers  
source 1..2183  
/organism="PCR product"  
/mol\_type="other DNA"  
primer\_bind 1..48  
/label=Barcode5\_cagc\_N10\_leader\_fp  
primer\_bind 1..20  
/label=Barcode5\_cagc\_fp  
gap 21..30  
/estimated\_length=10  
5'UTR 31..100  
/label=RV leader  
/note="SPBN leader"  
CDS 101..1450  
/codon\_start=1  
/locus\_tag="N"  
/label=N  
/note="N"  
/  
translation="MDADKIVFKVNNQVVSLKPEIIVDQY EYKYP AIKDLKKPCITLGK  
APDLNKAYKSVLSGMSAAKLNPDVCSYLAAMQFFEGT  
CPEDWTSYGIVIARKGDKIT  
PGSLVEIKRTDVEGNWAL TGGMELTRDPTV  
PEHASLVGLLLSLYRLSKISGQNTGNYKT  
NIADRIEQIFETAPFVKIVEHHTLMTTHKMCAN  
WSTIPNFRFLAGTYDMFFSRIEHLYS  
AIRVGT VVTAYEDCSGLVSFTGFIKQINLTARE  
AILYFFHKNFEEEEIRRMFEPGQETAV  
PHSYFIHFRSLGLSGKSPYSSNAVGHVFNLIH  
FVGCYMGQVRSLNATVIAACAPHEMSV  
LGGYLGEFFGKGT FERRFRDEKELQEYEA  
AELTKTDVALADDGTVNSDDEDYFSGET  
RSPEAVYTRIMMNGGRLKRSHIRRYVSVSSNH  
QARPNSFAEFLNKTYSSDS"  
CDS 1460..1480  
/codon\_start=1  
/locus\_tag="TEV site"

```

        /label=TEV site
        /note="TEV site"
        /translation="ENLYFQS"
CDS      1490..1609
        /codon_start=1
        /locus_tag="ECFP destabilized by fusion to
residues 422-461
        of mouse ornithine decarboxylase, giving an in
vivo(1)"
        /product="ECFP destabilized by fusion to residues
422-461
        of mouse ornithine decarboxylase, giving an in
vivo
        half-life of ~2 hours"
422-461
        /label=ECFP destabilized by fusion to residues
422-461...
        /label=ECFP destabilized by fusion to residues
422-461 of
        mouse ornithine decarboxylase, giving an in
vivo(1)
        /note="destabilization domain"
        /note="mammalian codon-optimized"
        /
translation="SHGFPPEVEEQDDGTLPMSCAQESGMDRHPAACASARINV"
CDS      1703..2167
        /codon_start=1
        /locus_tag="P"
        /label=P
        /note="P"
        /
translation="MSKIFVNPSAIRAGLADLEMAEETVDLINRNIEDNQAHLQGEPIE
VDNLPEDMGRHLHDDGKSPNHGEIAKVGEGKYREDFQMDEGEDPSFLFQSYLENVGVQI
VRQMRSGERFLKIWSQTVEEIISYVAVNFPNPPGKSSDKSTQTTGRELKK"
        primer_bind      complement(2148..2183)
        /label=Barcode3_P_rp
ORIGIN
      1 acacgcatga cacactcagc nnnnnnnnnn acgcttaaca accagatcaa
agaaaaaaca
      61 gacattgtca attgcaaagc aaaaatgtaa caccctaca atggatgccg
acaagattgt
     121 attcaaagtc aataatcagg tggctctctt gaagcctgag attatcgtgg
atcaatatga
     181 gtacaagtac cctgccatca aagatttgaa aaagccctgt ataaccctag
gaaaggctcc
     241 cgatttaa ataaagcataca agtcagtttt gtcaggcatg agcgccgcca
aacttaatcc
```

301 tgacgatgta tgttcctatt tggcagcggc aatgcagttt tttgagggga  
catgtccgga  
361 agactggacc agctatggaa ttgtgattgc acgaaaagga gataagatca  
ccccaggttc  
421 tctggtggag ataaaacgta ctgatgtaga agggaattgg gctctgacag  
gaggcatgga  
481 actgacaaga gaccccactg tccctgagca tgcgtcctta gtcggtcttc  
tcttgagtct  
541 gtataggttg agcaaaatat ccgggcaaaa cactggtaac tataagacaa  
acattgcaga  
601 caggatagag cagatTTTTG agacagcccc ttttgTtaaA atcgtggaac  
accatactct  
661 aatgacaact cacaaaatgt gtgctaattg gagtactata ccaaacttca  
gatttttggc  
721 cggaacctat gacatgtttt tctcccggat tgagcatcta tattcagcaa  
tcagagtggg  
781 cacagttgtc actgcttatg aagactgttc aggactggta tcatttactg  
ggttcataaa  
841 acaaatcaat ctaccgcta gagaggcaat actatatttc ttccacaaga  
actttgagga  
901 agagataaga agaatgtttg agccagggca ggagacagct gttcctcact  
cttatttcat  
961 ccacttccgt tcaactaggct tgagtgggaa atctccttat tcatcaaatg  
ctgttggtca  
1021 cgtgttcaat ctcaattcact ttgtaggatg ctatatgggt caagtccgat  
ccctaaatgc  
1081 aacggttatt gctgcatgtg ctctcatga aatgtctggt ctagggggct  
atctgggaga  
1141 ggaattcttc gggaaaggga catttgaag aagattcttc agagatgaga  
aagaacttca  
1201 agaatacgag gcggtgaac tgacaaagac tgacgtagca ctggcagatg  
atggaactgt  
1261 caactctgac gacgaggact acttttcagg tgaaaccaga agtccggagg  
ctgtttatac  
1321 tcgaatcatg atgaatggag gtcgactaaa gagatctcac atacggagat  
atgtctcagt  
1381 cagttccaat catcaagccc gtccaaactc attcgccgag tttctaaaca  
agacatattc  
1441 gagtgactca ggttccggag agaacctcta cttccaatcg ggatccggta  
gccatggctt  
1501 cccgccggag gtggaggagc aggatgatgg cacgctgcc atgtcttgtg  
cccaggagag  
1561 cgggatggac cgtcaccctg cagcctgtgc ttctgctagg atcaatgtgt  
aagaagttga  
1621 ataacaaaat gccggaaatc tacggattgt gtatatccat catgaaaaa  
actaacaccc  
1681 ctctttcga accatcccaa acatgagcaa gatctttgtc aatcctagtg  
ctattagagc  
1741 cggctctggcc gatcttgaga tggctgaaga aactgttgat ctgatcaata  
gaaatatcga

```
1801 agacaatcag gctcatctcc aaggggaacc catagaggtg gacaatctcc
ctgaggatat
1861 ggggcgactt cacctggatg atggaaaatc gcccaacat ggtgagatag
ccaaggtggg
1921 agaaggcaag tatcgagagg actttcagat ggatgaagga gaggatccta
gcttcctggt
1981 ccagtcatac ctggaaaatg ttggagtcca aatagtcaga caaatgaggt
caggagagag
2041 atttctcaag atatggtcac agaccgtaga agagattata tcctatgtcg
cggtcaactt
2101 tcccaaccct ccaggaaagt cttcagagga taaatcaacc cagactactg
gccgagagct
2161 caagaagtac tagagtagca ctc
//
```



LOCUS Exported 2183 bp ds-DNA linear SYN  
07-JAN-2019  
DEFINITION synthetic linear DNA.  
ACCESSION .  
VERSION .  
KEYWORDS .  
SOURCE synthetic DNA construct  
ORGANISM synthetic DNA construct  
REFERENCE 1 (bases 1 to 2183)  
AUTHORS Trial User  
TITLE Direct Submission  
JOURNAL Exported Jan 7, 2019 from SnapGene 4.1.9  
<http://www.snapgene.com>

FEATURES Location/Qualifiers  
source 1..2183  
/organism="synthetic DNA construct"  
/mol\_type="other DNA"  
primer\_bind 1..48  
/label=Barcode9\_cagc\_N10\_leader\_fp  
primer\_bind 1..20  
/label=Barcode9\_cagc\_fp  
gap 21..30  
/estimated\_length=10  
5'UTR 31..100  
/label=RV leader  
/note="SPBN leader"  
misc\_feature 89..97  
/label=Transcription start signal (N)  
CDS 101..1450  
/codon\_start=1  
/locus\_tag="N"  
/label=N  
/note="N"  
/  
translation="MDADKIVFKVNNQVVSLKPEIIVDQYQYKYPAlKDLKKPCITLKG  
APDLNKAYKSVLSGMSAAKLNPDVCSYLAAMQFFEGTCEPDWTSYGIVlARKGDKIT  
PGSLVEIKRTDVEGNWALTGGMELTRDPTVPEHASLVGLLLSLYRLSKISGQNTGNYKT  
NIADRIEQIFETAPFVKIVEHHTLMTTHKMCANWSTIPNFRFLAGTYDMFFSRIEHLYS  
AIRVGTVV TAYEDCSGLVSFTGFIKQINLTAREAILYFFHKNFEEEIRRMFEPGQETAV  
PHSYFIHFRLGLSGKSPYSSNAVGHVFNLlHFVGCYMGQVRSLNATVIAACAPHEMSV  
LGGYLGEFFGKGTFFRRDEKELQEYEAELTKTDVALADDGTVNSDDEDYFSGET  
RSPEAVYTRIMMNGGRLKRSHIRRYVSVSSNHQARPNSFAEFLNKTYSSDS"  
CDS 1460..1480

```

/codon_start=1
/product="tobacco etch virus (TEV) protease
recognition and
cleavage site"
/label=TEV site
/translation="ENLYFQS"
CDS
1490..1609
/codon_start=1
/locus_tag="ECFP destabilized by fusion to
residues 422-461
of mouse ornithine decarboxylase, giving an in
vivo(1)"
/product="ECFP destabilized by fusion to residues
422-461
of mouse ornithine decarboxylase, giving an in
vivo
half-life of ~2 hours"
/label=PEST
/label=ECFP destabilized by fusion to residues
422-461 of
mouse ornithine decarboxylase, giving an in
vivo(1)
/note="destabilization domain"
/note="mammalian codon-optimized"
/
translation="SHGFPPEVEEQDGTLPMSCAQESGMDRHPAACASARINV"
misc_feature 1661..1671
/label=Transcription stop/pA signal (N/P & P/M))
misc_feature 1674..1682
/label=Transcription start signal (P)
misc_feature 1703..2167
/locus_tag="P"
/label=P
/note="P"
primer_bind complement(2148..2183)
/label=Barcode4_P_rp
ORIGIN
1 ctgcgtgctc tacgaccagc nnnnnnnnnn acgcttaaca accagatcaa
agaaaaaaca
61 gacattgtca attgcaaagc aaaaatgtaa caccctaca atggatgccg
acaagattgt
121 attcaaagtc aataatcagg tggctctctt gaagcctgag attatcgtgg
atcaatatga
181 gtacaagtac cctgccatca aagatttgaa aaagccctgt ataaccctag
gaaaggctcc
241 cgatttaa ataaagcataca agtcagtttt gtcaggcatg agcgccgcca
aacttaatcc
301 tgacgatgta tgttcctatt tggcagcggc aatgcagttt tttgagggga
catgtccgga
361 agactggacc agctatggaa ttgtgattgc acgaaaagga gataagatca
```

ccccaggttc  
421 tctggtggag ataaaacgta ctgatgtaga agggaattgg gctctgacag  
gaggcatgga  
481 actgacaaga gaccccactg tccctgagca tgcgtcctta gtcggtcttc  
tcttgagtct  
541 gtataggttg agcaaaatat ccgggcaaaa cactggtaac tataagacaa  
acattgcaga  
601 caggatagag cagatTTTTG agacagcccc ttttgTtaaa atcgtggaac  
accatactct  
661 aatgacaact cacaaaatgt gtgctaattg gagtactata ccaaacttca  
gatttttggc  
721 cggaacctat gacatgtttt tctcccggat tgagcatcta tattcagcaa  
tcagagtggg  
781 cacagttgtc actgcttatg aagactgttc aggactggta tcatttactg  
ggttcataaa  
841 acaaatcaat ctcaccgcta gagaggcaat actatatttc ttccacaaga  
actttgagga  
901 agagataaga agaatgtttg agccagggca ggagacagct gttcctcact  
cttatttcat  
961 ccacttccgt tccactaggct tgagtgggaa atctccttat tcatcaaatg  
ctgttggtca  
1021 cgtgttcaat ctcattcact ttgtaggatg ctatatgggt caagtcagat  
ccctaaatgc  
1081 aacggttatt gctgcatgtg ctctcatga aatgtctgtt ctagggggct  
atctgggaga  
1141 ggaattcttc gggaaaggga catttgaaag aagattcttc agagatgaga  
aagaacttca  
1201 agaatacgag gcggtgaac tgacaaagac tgacgtagca ctggcagatg  
atggaactgt  
1261 caactctgac gacgaggact acttttcagg tgaaccaga agtccggagg  
ctgtttatac  
1321 tcgaatcatg atgaatggag gtcgactaaa gagatctcac atacggagat  
atgtctcagt  
1381 cagttccaat catcaagccc gtccaaactc attcgccgag tttctaaca  
agacatatc  
1441 gagtgactca ggttccggag agaacctcta cttccaatcg ggatccggta  
gccatggctt  
1501 cccgccggag gtggaggagc aggatgatgg cacgctgcc atgtcttgtg  
cccaggagag  
1561 cgggatggac cgtcaccctg cagcctgtgc ttctgctagg atcaatgtgt  
aagaagttga  
1621 ataacaaaat gccggaaatc tacggattgt gtatatccat catgaaaaa  
actaacaccc  
1681 ctcctttcga accatcccaa acatgagcaa gatctttgtc aatcctagtg  
ctattagagc  
1741 cggctctggcc gatcttgaga tggctgaaga aactgttgat ctgatcaata  
gaaatatcga  
1801 agacaatcag gctcatctcc aaggggaacc catagagggtg gacaatctcc  
ctgaggatat  
1861 ggggcgactt cacctggatg atggaaaatc gcccaacat ggtgagatag

```
ccaaggtggg
  1921 agaaggcaag tatcgagagg actttcagat ggatgaagga gaggatccta
gcttcctggt
  1981 ccagtcatac ctggaaaatg ttggagtcca aatagtcaga caaatgaggt
caggagagag
  2041 atttctcaag atatggtcac agaccgtaga agagattata tcctatgtcg
cggtcaactt
  2101 tcccaaccct ccaggaaagt cttcagagga taaatcaacc cagactactg
gccgagagct
  2161 caagaagtgt gtatcagtac atg
//
```

LOCUS Exported 2024 bp ds-DNA linear SYN  
07-JAN-2019  
DEFINITION synthetic linear DNA.  
ACCESSION .  
VERSION .  
KEYWORDS .  
SOURCE synthetic DNA construct  
ORGANISM synthetic DNA construct  
REFERENCE 1 (bases 1 to 2024)  
AUTHORS Trial User  
TITLE Direct Submission  
JOURNAL Exported Jan 7, 2019 from SnapGene 4.1.9  
<http://www.snapgene.com>

FEATURES Location/Qualifiers  
source 1..2024  
/organism="synthetic DNA construct"  
/mol\_type="other DNA"  
primer\_bind 1..48  
/label=Barcode1\_cagc\_N10\_leader\_fp  
primer\_bind 1..20  
/label=Barcode1\_cagc\_fp  
gap 21..30  
/estimated\_length=10  
5'UTR 31..100  
/label=RV leader  
/note="SPBN leader"  
misc\_feature 89..97  
/locus\_tag="Transcriptional start (N)"  
/label=Transcriptional start (N)  
CDS 101..1450  
/codon\_start=1  
/locus\_tag="N"  
/label=N  
/note="N"  
/  
translation="MDADKIVFKVNNQVVSLKPEIIVDQYQYKYP AIKDLKKPCITLGK  
APDLNKAYKSVLSGMSAAKLNPDVCSYLAAMQFFEGTCPEDWTSYGIVIARKGDKIT  
PGSLVEIKRTDVEGNWALTGGMELTRDPTVPEHASLVGLLLSLYRLSKISGQNTGNYKT  
NIADRIEQIFETAPFVKIVEHHTLMTTHKMCANWSTIPNFRFLAGTYDMFFSRIEHLYS  
AIRVGTVV TAYEDCSGLVSFTGFIKQINLTAREAILYFFHKNFEEEIRRMFEPGQETAV  
PHSYFIHFRSLGLSGKSPYSSNAVGHVFNLIHFVGCYMGQVRS LNATVIAACAPHEMSV  
LGGYLGEFFGKGT FERRFRDEKELQEYEA AELTKTDVALADDGTVNSDDEDYFSGET  
RSPEAVYTRIMMNGGRLKRSHIRRYVSVSSNHQARPNSFAEFLNKTYSSDS"

misc\_feature 1502..1512  
/label=Transcription stop/pA signal (N/P & P/M))  
misc\_feature 1515..1523  
/locus\_tag="Transcriptional start (P)"  
/label=Transcriptional start (P)  
misc\_feature 1544..2008  
/locus\_tag="P"  
/label=P  
/note="P"  
primer\_bind complement(1989..2024)  
/label=Barcode2\_P\_rp

ORIGIN

1 tcagacgatg cgtcatcagc nnnnnnnnnn acgcttaaca accagatcaa  
agaaaaaaca  
61 gacattgtca attgcaaagc aaaaatgtaa caccctaca atggatgccg  
acaagattgt  
121 attcaaagtc aataatcagg tggctctctt gaagcctgag attatcgtgg  
atcaatatga  
181 gtacaagtac cctgccatca aagatttgaa aaagccctgt ataaccctag  
gaaaggctcc  
241 cgatttaa ataaagcataca agtcagtttt gtcaggcatg agcgccgcca  
aacttaatcc  
301 tgacgatgta tggctctatt tggcagcggc aatgcagttt tttgagggga  
catgtccgga  
361 agactggacc agctatggaa ttgtgattgc acgaaaagga gataagatca  
ccccaggttc  
421 tctggtggag ataaaacgta ctgatgtaga aggaattgg gctctgacag  
gaggcatgga  
481 actgacaaga gacccactg tccctgagca tgcgtcctta gtcggtcttc  
tcttgagtct  
541 gtataggttg agcaaatat ccgggcaaaa cactggtaac tataagacaa  
acattgcaga  
601 caggatagag cagatTTTTG agacagcccc ttttgTtaaa atcgtggaac  
accatactct  
661 aatgacaact cacaaaatgt gtgctaattg gactactata ccaaacttca  
gatttttggc  
721 cggaacctat gacatgtttt tctcccggat tgagcatcta tattcagcaa  
tcagagtggg  
781 cacagttgtc actgcttatg aagactgttc aggactggta tcatttactg  
ggttcataaa  
841 acaaatcaat ctcaccgcta gagaggcaat actatatttc ttccacaaga  
actttgagga  
901 agagataaga agaatgtttg agccagggca ggagacagct gttcctcact  
cttatttcat  
961 ccacttccgt tcactaggct tgagtgggaa atctccttat tcatcaaatg  
ctgttggtca  
1021 cgtgttcaat ctcatcact ttgtaggatg ctatatgggt caagtcagat  
ccctaaatgc  
1081 aacggttatt gctgcatgtg ctctcatga aatgtctggt ctagggggct  
atctgggaga

```
1141 ggaattcttc gggaaagga cattgaaag aagattcttc agagatgaga
aagaacttca
1201 agaatacgag gcggctgaac tgacaaagac tgacgtagca ctggcagatg
atggaactgt
1261 caactctgac gacgaggact acttttcagg tgaaaccaga agtccggagg
ctgtttatac
1321 tcgaatcatg atgaatggag gtcgactaaa gagatctcac atacggagat
atgtctcagt
1381 cagttccaat catcaagccc gtccaaactc attcgccgag tttctaaaca
agacatatc
1441 gagtgactca taagaagttg aataacaaaa tgccggaat ctacggattg
tgtatatcca
1501 tcatgaaaaa aactaacacc cctcctttcg aaccatcca aacatgagca
agatctttgt
1561 caatcctagt gctattagag ccggtctggc cgatcttgag atggctgaag
aaactgttga
1621 tctgatcaat agaaatatcg aagacaatca ggctcatctc caaggggaac
ccatagaggt
1681 ggacaatctc cctgaggata tggggcgact tcacctggat gatggaaaat
cgcccaacca
1741 tggtagata gccaaggtgg gagaaggcaa gtatcgagag gactttcaga
tggatgaagg
1801 agaggatcct agcttcctgt tccagtcata cctggaaaat gttggagtcc
aaatagtcag
1861 acaaatgagg tcaggagaga gatttctcaa gatatgggtca cagaccgtag
aagagattat
1921 atcctatgtc gcggtcaact ttccaaccc tccaggaaag tcttcagagg
ataaatcaac
1981 ccagactact ggccgagagc tcaagaagct atacatgact ctgc
//
```

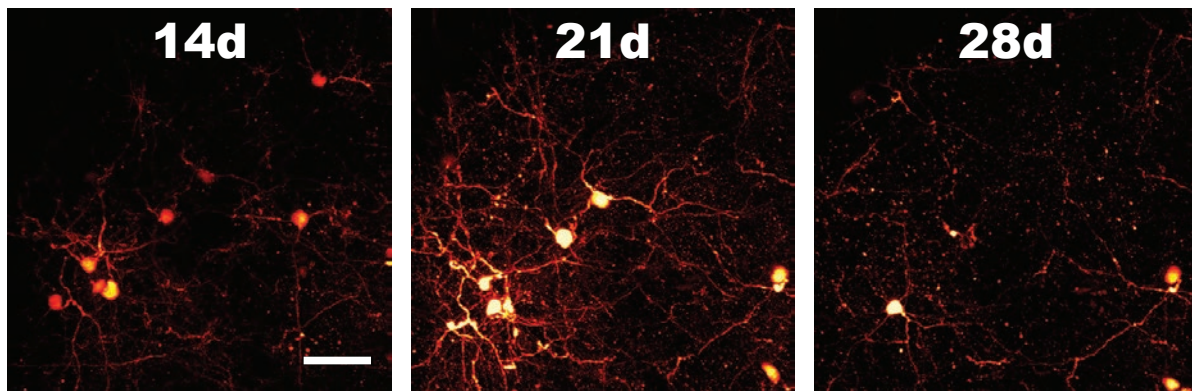

Source: https://www.biorxiv.org/content/10.1101/550640v1.full.pdf
